# Supplementary material for: Flood algorithm: a novel metaheuristic algorithm for optimization problems
Source: PeerJ Comput Sci. 2024 Oct 2;10:e2278. doi: 10.7717/peerj-cs.2278 (PMC11623059; doi:10.7717/peerj-cs.2278)
Supplement: Supplemental Information 6 [file peerj-cs-10-2278-s006.xlsx]

## Sheet: Sheet1
beale	sixhump camelback	quatric	easom	michalewicz	sphere	ackley	rastrigin	shubert	bentcigar	hgbat	griewank	rosenbrock	levy	Zakharov
3.79327e-05	-1.03162	7.54387e-06	-8.10354e-05	-9.65016	0.00323492	0.757242	1.12397	-186.727	3.62583e+06	0.311938	0.362067	133.025	0.0418287	286.33
0.763955	-1.03161	5.59072e-06	-0.998896	-9.63822	0.00077001	0.753162	1.09497	-186.731	4.0536e+06	0.398251	0.358949	84.1999	0.0420007	317.48
8.46546e-06	-1.03163	8.02389e-06	-8.10946e-05	-9.62873	0.000360921	0.887429	1.44839	-186.73	7.12579e+06	1.13798	0.221238	78.7583	0.0507472	184.892
0.762164	-1.03161	4.81864e-06	-0.999323	-9.64867	0.000337658	0.803938	1.65515	-186.731	5.62576e+06	1.06685	0.444453	78.9641	0.0899335	248.749
5.38974e-05	-1.03163	6.49205e-06	-8.10062e-05	-9.64837	0.000541972	0.863604	1.47324	-186.731	2.68809e+06	0.476419	0.217352	77.8357	0.0769093	366.989
1.88243e-05	-1.03161	7.91632e-06	-0.998441	-9.64756	0.000299283	0.755597	2.07443	-186.729	3.0649e+06	0.420383	0.321501	28.6301	0.0756897	421.865
9.56225e-06	-1.0316	3.4628e-06	-0.99964	-9.64666	0.00241563	0.942377	1.64918	-186.726	4.30101e+06	1.26703	0.320134	79.3685	0.0429628	251.207
0.762554	-1.03163	8.88379e-06	-8.08759e-05	-9.64182	0.00143145	0.702247	1.45707	-186.73	5.01071e+06	1.25743	0.249701	31.6296	0.0721834	441.824
1.09565e-06	-1.03162	8.10866e-06	-8.09412e-05	-9.65278	0.00030176	0.760299	1.36455	-186.729	3.55466e+06	0.442301	0.165806	21.3357	0.0490564	325.665
9.5811e-07	-1.03161	3.61482e-06	-0.998652	-9.64132	0.000133542	0.648712	1.40023	-186.73	4.47604e+06	0.35289	0.138299	21.8824	0.0761198	365.38
1.79699e-05	-1.03162	6.32141e-06	-0.998986	-9.65002	0.00560476	0.860899	1.97298	-186.728	3.0174e+06	0.392473	0.26016	4.98452	0.0669037	261.694
0.762621	-1.03162	7.01784e-06	-0.999949	-9.64905	0.0029921	0.970969	1.74108	-186.731	6.50905e+06	1.15746	0.209582	27.7348	0.0492012	377.763
6.30616e-06	-1.03163	3.5729e-06	-8.10741e-05	-9.64392	0.00109716	0.897138	1.75505	-186.729	3.6554e+06	0.41393	0.190243	18.4107	0.0989925	287.571
5.08888e-06	-1.03162	3.53234e-06	-0.999681	-9.64184	0.00316924	0.922526	1.23412	-186.73	6.94158e+06	0.337032	0.201421	78.8243	0.0894848	290.883
7.39834e-06	-1.03163	9.55249e-06	-0.998819	-9.64845	0.00126548	0.866817	1.30222	-186.726	6.01136e+06	0.983002	0.388639	28.7759	0.0573018	267.299
4.71855e-06	-1.0316	3.30118e-06	-8.10162e-05	-9.64971	0.00198283	0.871419	1.61743	-186.731	3.79974e+06	0.31	0.23313	23.6841	0.0693191	334.842
9.31386e-06	-1.03161	5.2095e-06	-8.10569e-05	-9.64964	0.00357521	0.926528	1.63656	-186.727	3.23183e+06	0.366287	0.226184	9.69543	0.0413939	314.493
1.36818e-05	-1.03161	4.82584e-06	-8.10355e-05	-9.65309	0.00117539	0.945118	1.0209	-186.723	7.32927e+06	1.06136	0.364832	141.129	0.0786823	308.878
0.762928	-1.03163	1.17523e-05	-8.10659e-05	-9.64033	9.39343e-05	0.851519	1.68582	-186.73	4.65892e+06	0.383156	0.260105	28.2292	0.0307884	424.027
0.762278	-1.03162	1.12138e-05	-0.997429	-9.63782	0.000926001	0.823704	1.51986	-186.729	4.32165e+06	0.305001	0.21405	81.3002	0.0546389	233.395
0.762087	-1.03159	5.46623e-06	-0.998849	-9.64819	0.000325483	0.720389	1.48783	-186.73	6.73326e+06	0.423994	0.302424	28.1938	0.0697263	283.165
1.63393e-05	-1.03163	7.73108e-06	-0.995715	-9.6524	0.000708935	0.879972	1.65233	-186.73	4.25385e+06	0.361976	0.325616	74.5653	0.0973026	376.489
0.762158	-1.03163	8.06667e-06	-0.995379	-9.64285	0.000346437	0.793708	0.954344	-186.716	5.3058e+06	0.94494	0.234697	82.172	0.082047	257.968
3.51551e-07	-1.03163	4.31175e-06	-8.10369e-05	-9.64811	0.00223441	0.910977	1.22854	-186.73	2.75965e+06	0.414993	0.234156	29.1095	0.0499934	197.817
0.762125	-1.03162	6.94358e-06	-0.999038	-9.63872	0.000341904	0.775345	1.53081	-186.729	7.76213e+06	0.334724	0.175102	75.7052	0.0900265	260.8
6.62299e-06	-1.03162	1.43489e-05	-0.999886	-9.64161	0.000192791	0.915919	1.25192	-186.729	1.79246e+06	0.95841	0.274695	67.9725	0.0474514	302.371
0.762204	-1.03163	4.0662e-06	-0.999076	-9.64281	0.000619694	0.955976	1.77966	-186.73	3.53532e+06	0.947508	0.261318	77.3259	0.126536	181.206
0.762219	-1.03161	6.86211e-06	-0.998158	-9.63459	0.000457416	0.959217	2.09366	-186.731	4.03801e+06	0.294784	0.292714	23.5919	0.102158	223.212
0.762434	-1.03162	3.96209e-06	-8.09121e-05	-9.64394	0.000305576	0.90108	1.40968	-186.729	5.41567e+06	0.485208	0.288649	76.2127	0.0529446	399.783
0.762484	-1.03163	2.92649e-06	-0.987627	-9.64359	0.00179667	0.991798	2.05053	-186.72	4.60253e+06	0.408797	0.139458	76.0901	0.100383	373.693
5.04011e-06	-1.03162	7.20749e-06	-8.10939e-05	-9.64047	0.00147732	0.753048	1.46667	-186.731	7.30009e+06	1.01656	0.190021	23.215	0.0492917	397.877
0.762318	-1.03162	4.048e-06	-0.999603	-9.64972	0.00178043	0.960334	1.75491	-186.73	8.03753e+06	1.49087	0.200901	81.7975	0.0502341	436.623
2.6854e-05	-1.03162	2.22425e-06	-8.10433e-05	-9.65175	0.000505826	0.886299	1.30432	-186.729	3.2804e+06	0.378218	0.16071	78.1961	0.0423507	416.032
0.762407	-1.03163	1.07559e-05	-0.999752	-9.64661	0.000261088	0.793046	1.75175	-186.73	5.14236e+06	0.836765	0.1622	31.7674	0.076965	398.742
4.81305e-06	-1.03159	5.92327e-06	-0.997635	-9.64765	0.000136953	0.683705	1.49077	-186.731	6.63029e+06	0.876765	0.241146	83.7999	0.0408143	375.892
0.762296	-1.03163	1.10123e-05	-8.08671e-05	-9.64689	0.00254435	0.907122	1.33203	-186.73	3.97079e+06	0.450111	0.305482	72.8428	0.0730715	378.328
0.762506	-1.03162	2.71635e-06	-8.10971e-05	-9.63835	0.00400506	0.915367	1.26859	-186.729	8.92172e+06	1.21297	0.253531	82.2301	0.0658519	379.127
4.21051e-05	-1.03163	7.68276e-06	-0.999518	-9.64585	0.00293647	0.830502	1.43511	-186.729	6.30447e+06	1.14459	0.277503	17.5446	0.0538156	341.206
0.762285	-1.03157	4.87106e-06	-0.997435	-9.64039	0.00254723	1.01191	2.05932	-186.73	5.63447e+06	0.414636	0.25184	80.4099	0.141273	357.704
4.99504e-06	-1.03162	1.1835e-05	-0.99859	-9.64701	0.000990461	0.788522	1.41972	-186.726	5.13055e+06	0.358501	0.282518	27.5123	0.0826349	315.275
1.33859e-05	-1.03163	5.06486e-06	-8.09587e-05	-9.64034	0.000170898	0.803532	1.57882	-186.726	4.6515e+06	0.904819	0.321922	14.1273	0.0822144	249.637
0.762191	-1.03163	7.63857e-06	-8.08946e-05	-9.63921	0.00239645	0.784128	1.9072	-186.728	5.89223e+06	1.0332	0.136761	77.3939	0.0528054	500.4
1.03842e-05	-1.03163	6.75496e-06	-0.998058	-9.63952	0.000625308	0.792078	1.82099	-186.73	5.72194e+06	0.29844	0.158018	78.4948	0.0724654	271.008
3.05967e-07	-1.03162	3.50464e-06	-8.10877e-05	-9.64713	4.22435e-05	0.772272	1.13025	-186.728	3.92087e+06	0.480677	0.268515	83.9285	0.0697891	236.767
0.762486	-1.03163	5.35641e-06	-0.999074	-9.63994	0.000710504	0.693919	1.7237	-186.728	2.58506e+06	1.06296	0.164293	21.682	0.0662744	284.164
2.26864e-05	-1.03163	4.10656e-06	-0.999539	-9.64817	0.000332328	1.07154	1.25406	-186.727	5.05465e+06	1.10061	0.192659	92.01	0.0506037	318.536
0.762334	-1.03161	3.31075e-06	-0.999792	-9.64507	0.000322525	0.904191	1.85059	-186.729	6.84083e+06	0.965109	0.19591	89.2204	0.055304	346.582
8.1218e-09	-1.0316	3.91443e-06	-8.10404e-05	-9.64018	0.000811632	0.891982	1.60849	-186.73	5.34378e+06	0.404852	0.222251	12.9539	0.0498698	203.64
0.762441	-1.03163	1.27195e-05	-0.999198	-9.64421	0.000186954	0.888782	0.924309	-186.73	4.44879e+06	0.35674	0.190355	75.5133	0.0544148	290.343
5.34263e-06	-1.03161	6.99459e-06	-8.10913e-05	-9.63857	0.0069442	0.943732	1.53591	-186.731	6.52747e+06	0.327576	0.16496	11.1766	0.0519276	416.68
1.24806e-05	-1.03163	6.66995e-06	-0.997485	-9.64927	0.000513273	0.892409	1.46382	-186.729	2.92725e+06	0.484369	0.208965	80.8826	0.0468732	279.077
4.69279e-06	-1.03162	5.3124e-06	-0.997669	-9.64791	0.00100925	0.823512	1.73423	-186.731	5.28873e+06	0.397883	0.070947	21.8596	0.0818299	252.083
0.762551	-1.03162	5.0665e-06	-8.07978e-05	-9.63942	0.00158654	0.942661	1.90572	-186.726	8.61419e+06	0.541686	0.224887	76.3731	0.105025	415.047
2.58612e-05	-1.03162	9.48883e-06	-0.999275	-9.64989	0.00110588	0.72554	1.71078	-186.731	4.31396e+06	0.3399	0.189169	21.5139	0.0779819	266.658
9.37636e-06	-1.03163	1.0835e-05	-8.10996e-05	-9.63988	0.00108705	0.664516	1.47665	-186.729	4.8578e+06	0.500934	0.251295	26.0633	0.090903	362.545
9.82813e-07	-1.03157	2.45587e-06	-0.999546	-9.64172	0.00381986	0.776499	1.44609	-186.731	5.93718e+06	0.826497	0.189214	12.528	0.0771365	317.875
7.2714e-06	-1.03161	5.16671e-06	-0.998289	-9.64417	0.000242439	0.855201	1.33295	-186.731	3.24334e+06	0.504542	0.329396	76.9336	0.109192	381.077
0.762157	-1.03162	4.48267e-06	-0.999206	-9.64428	6.13299e-05	1.00677	1.85148	-186.73	2.97525e+06	0.417518	0.142476	81.2963	0.0525579	310.039
0.762345	-1.03162	3.91732e-06	-0.999985	-9.64975	0.000443334	0.915428	2.1006	-186.728	5.4459e+06	1.08554	0.214833	28.32	0.0629597	289.294
4.53156e-06	-1.03163	9.33686e-06	-0.998315	-9.65059	0.00154643	0.798684	1.62124	-186.73	6.25916e+06	1.25677	0.24488	19.0651	0.034497	285.494
9.82071e-06	-1.03162	2.36419e-06	-0.999648	-9.64523	0.000971526	0.948893	2.35812	-186.728	4.72283e+06	1.1058	0.275209	75.7681	0.0767507	258.372
3.71862e-07	-1.03162	7.67628e-06	-0.998807	-9.65184	0.000731558	0.784501	1.54365	-186.731	5.91833e+06	0.319432	0.233317	78.0379	0.0971869	410.301
8.59195e-06	-1.03163	6.56745e-06	-0.999365	-9.63851	0.00305509	0.82887	1.3908	-186.731	5.95647e+06	0.957179	0.279736	86.4111	0.062429	526.249
8.5443e-06	-1.03162	9.64594e-06	-0.999796	-9.64113	0.00254318	0.796581	1.37273	-186.731	6.69397e+06	1.34123	0.205386	26.1357	0.108756	302.882
5.35116e-05	-1.03163	9.93076e-06	-8.09976e-05	-9.63239	0.000239643	0.962614	1.03229	-186.731	1.02473e+07	0.30091	0.213615	27.1916	0.0473324	313.38
2.86612e-07	-1.03158	8.61069e-06	-8.07625e-05	-9.64873	0.000220886	0.687417	2.15838	-186.73	4.55794e+06	1.12645	0.140804	70.097	0.0493346	333.635
0.76251	-1.0316	3.4735e-06	-0.999271	-9.64691	0.000523311	0.938158	1.57998	-186.73	2.90941e+06	1.18466	0.185977	14.4843	0.0504827	331.918
1.33027e-05	-1.03163	1.10849e-05	-0.99994	-9.64167	9.10898e-05	0.711996	1.59489	-186.73	6.66713e+06	0.398969	0.211255	80.0325	0.0577126	425.429
4.51825e-06	-1.0316	8.37327e-06	-8.0942e-05	-9.6472	0.00108135	0.949933	1.35077	-186.727	3.99531e+06	0.78764	0.273066	39.3844	0.0638684	204.175
1.77641e-05	-1.03162	1.35441e-05	-8.10895e-05	-9.65158	4.34238e-05	0.745669	1.08892	-186.73	4.50281e+06	0.425942	0.149865	78.6146	0.0683902	413.656
2.24214e-05	-1.03162	7.76071e-06	-0.998331	-9.64867	0.00350758	0.814036	1.89919	-186.731	2.61479e+06	1.20409	0.296396	74.8646	0.0404885	308.471
8.09398e-06	-1.03162	5.40065e-06	-8.08408e-05	-9.64836	0.00144991	0.811573	1.99625	-186.729	9.53398e+06	0.293011	0.177897	77.6287	0.0469927	375.806
5.38897e-05	-1.03161	7.11854e-07	-8.10409e-05	-9.64078	9.05539e-05	0.693502	1.69849	-186.731	6.43197e+06	0.40963	0.212721	81.9909	0.0703569	307.609
1.16268e-05	-1.03162	8.80869e-06	-8.0915e-05	-9.64493	0.00258715	0.803874	1.71436	-186.728	2.10507e+06	0.498389	0.290661	83.3689	0.058366	357.552
1.39526e-05	-1.03162	7.94199e-06	-8.07537e-05	-9.65165	0.000644268	0.938982	1.69123	-186.729	5.02821e+06	1.02927	0.234521	73.6148	0.0839642	538.04
5.27031e-05	-1.03163	4.07791e-06	-0.999712	-9.64907	0.00123447	0.716063	0.964198	-186.726	4.50456e+06	1.20677	0.138287	77.077	0.107596	346.978
0.762317	-1.03162	6.45049e-06	-0.999739	-9.64604	0.000323755	0.673736	1.70348	-186.728	4.17421e+06	0.519994	0.183236	14.4015	0.0574513	265.641
1.57447e-05	-1.03161	4.53565e-06	-8.10548e-05	-9.64633	0.00090657	0.763172	1.04823	-186.729	5.54554e+06	0.341229	0.390186	72.147	0.0699418	531.454
1.6008e-06	-1.03162	3.57736e-06	-8.05905e-05	-9.64156	0.000151628	0.630265	1.02172	-186.731	2.94244e+06	0.395809	0.251808	21.9589	0.0671213	467.827
2.90458e-06	-1.03162	5.55684e-06	-0.999229	-9.64544	1.88159e-05	1.04675	1.94753	-186.73	4.53431e+06	0.273986	0.203513	73.2266	0.0809413	339.241
2.86612e-07	-1.03162	8.22036e-06	-8.0573e-05	-9.64701	0.000388831	1.08131	1.41746	-186.73	8.14319e+06	0.428587	0.167782	77.1734	0.051014	371.873
2.69833e-05	-1.03162	5.32046e-06	-8.10856e-05	-9.63577	0.00446891	0.849424	1.24154	-186.726	4.08062e+06	0.396376	0.295469	23.0162	0.0658168	357.489
1.08479e-05	-1.03163	4.9797e-06	-8.10023e-05	-9.63816	0.000308305	0.787136	1.58187	-186.731	3.9932e+06	0.443132	0.108981	128.878	0.116194	297.119
1.41822e-05	-1.03163	4.25923e-06	-0.99622	-9.64681	0.000197762	0.813818	1.29223	-186.724	1.13157e+07	1.10563	0.176287	82.6525	0.122063	236.965
3.28983e-05	-1.03162	7.50877e-06	-0.996996	-9.64925	0.000731311	0.727508	0.964244	-186.73	7.67146e+06	0.856633	0.200229	20.4571	0.102676	155.826
3.29257e-06	-1.03162	3.70031e-06	-0.999742	-9.64476	0.00129298	0.720792	2.0508	-186.727	8.63446e+06	0.303292	0.154988	76.9554	0.0721178	256.062
0.762106	-1.03162	3.57613e-06	-8.10055e-05	-9.6559	0.00737777	0.882677	1.87316	-186.73	2.4741e+06	0.926223	0.305726	75.6242	0.0456489	351.303
9.43164e-06	-1.03161	4.79169e-06	-8.092e-05	-9.65199	3.61129e-05	0.67574	0.962504	-186.73	7.51316e+06	0.363128	0.303215	75.7527	0.0718015	304.218
1.54437e-05	-1.03162	2.894e-06	-8.10952e-05	-9.65023	0.000263542	0.809231	1.64998	-186.724	8.07422e+06	0.345084	0.358548	17.6352	0.0589456	338.206
0.762234	-1.03162	3.32658e-06	-8.07735e-05	-9.6492	0.000457138	0.805835	1.69609	-186.73	6.8048e+06	0.4378	0.248553	79.8113	0.0581441	390.439
2.86308e-06	-1.03162	6.11996e-06	-0.999819	-9.64517	0.000923252	0.793658	1.59482	-186.73	3.46579e+06	1.15389	0.254069	29.6125	0.04909	343.865
2.15553e-06	-1.03161	5.49147e-06	-8.10357e-05	-9.6442	0.000758409	0.747477	1.2922	-186.731	4.13499e+06	1.0366	0.169447	20.8792	0.10001	325.601
3.32766e-06	-1.03163	4.61119e-06	-8.10439e-05	-9.64851	0.000383489	1.05961	1.09702	-186.729	2.51111e+06	1.18789	0.358928	75.5045	0.0621933	436.58
7.62076e-06	-1.03163	6.5929e-06	-0.996443	-9.64168	0.00100898	0.90623	1.22331	-186.73	4.31528e+06	1.30229	0.242308	19.8708	0.102058	348.654
0.762152	-1.03163	9.84716e-06	-8.10406e-05	-9.6435	0.000676044	0.871245	1.50675	-186.727	3.91828e+06	0.412688	0.108083	80.0383	0.0540848	363.072
6.7496e-06	-1.03163	9.20631e-06	-8.10336e-05	-9.64124	0.000757265	0.794572	1.24981	-186.73	1.03969e+07	0.392683	0.176652	79.382	0.068947	396.694
2.39021e-07	-1.03162	3.05769e-06	-0.977442	-9.64873	0.000755038	0.657202	1.64449	-186.73	1.66264e+06	1.02536	0.299904	8.71842	0.0659939	329.971
0.763152	-1.03163	4.06111e-06	-0.999643	-9.64584	0.000736182	0.88336	1.78501	-186.73	3.99434e+06	1.08738	0.239643	78.8353	0.0590703	357.431
0.762679	-1.03162	7.60812e-06	-0.997253	-9.64228	0.000144059	0.971096	1.45304	-186.726	2.84951e+06	0.384534	0.15997	76.2424	0.103919	294.173
1.0423e-05	-1.03161	2.36441e-06	-0.998732	-9.64215	0.00110146	0.88462	1.01309	-186.73	3.33458e+06	0.488063	0.273658	81.2163	0.0662766	356.767
