# Supplementary material for: Flood algorithm: a novel metaheuristic algorithm for optimization problems
Source: PeerJ Comput Sci. 2024 Oct 2;10:e2278. doi: 10.7717/peerj-cs.2278 (PMC11623059; doi:10.7717/peerj-cs.2278)
Supplement: Supplemental Information 7 [file peerj-cs-10-2278-s007.xlsx]

## Sheet: Sheet1
beale	sixhump camelback	quatric	easom	michalewicz	sphere	ackley	rastrigin	shubert	bentcigar	hgbat	griewank	rosenbrock	levy	Zakharov
0.00597065	-1.02673	0.0889054	-0.656428	-4.70868	988.541	9.77624	2.34238	-186.333	1.64988e+09	63.5405	0.569754	60.3627	8.00417	5.46354
0.00236012	-1.03019	0.171344	-0.349562	-4.02229	37.5445	5.49878	24.4897	-186.198	1.54029e+09	38.4643	0.919945	35.5336	3.31369	40.8623
0.00472414	-1.02882	0.00363873	-0.996524	-3.96335	1390.33	9.83298	2.59051	-186.35	1.00193e+08	86.7146	1.12479	111.311	3.17182	81.9535
0.0025791	-1.01818	0.395984	-0.0260963	-4.324	60.2539	7.8906	14.0543	-184.497	7.61632e+08	11.6155	1.10352	32.3818	5.3666	9.38324
0.0135964	-0.99642	0.00158664	-0.762921	-4.24942	1743.16	2.10141	13.6187	-177.256	4.702e+08	11.8831	0.608357	60.4678	3.21259	24.6202
0.00474206	-1.02636	0.240408	-0.278959	-4.33292	919.114	6.80684	11.028	-185.337	5.74112e+08	37.8357	0.355278	32.0979	7.22001	7.11793
0.0148687	-1.01926	0.954728	-0.71159	-4.16981	391.163	0.577622	11.7366	-183.599	1.1303e+08	16.7951	0.617801	64.3763	3.87701	34.3538
0.00164009	-1.0245	0.0326873	-0.192499	-3.86548	2626.17	3.82404	11.856	-185.633	1.10334e+09	18.2991	0.419715	33.8462	3.07595	2.02446
0.0128038	-1.03102	0.0677204	-0.560397	-4.03447	2010.85	8.21996	15.7617	-185.756	1.18582e+09	35.9215	0.323686	67.5408	3.26197	7.01091
0.00093536	-1.03137	0.000124053	-0.237965	-4.19041	106.79	5.67487	7.41598	-185.742	1.01867e+09	56.9072	0.38207	150.336	3.07318	38.1791
0.00572838	-0.992118	0.204331	-0.627936	-4.65408	1607.38	6.87188	26.3826	-184.905	9.54024e+08	1.02775	1.16994	137.107	3.16652	38.1773
0.000338909	-0.996225	2.91161	-0.144042	-3.85925	789.194	6.79831	9.18714	-186.457	7.45751e+08	17.919	0.303631	51.9807	3.27201	20.8326
0.00360823	-1.02867	0.310852	-0.643034	-4.51781	280.695	6.81967	8.5699	-184.339	1.31785e+09	65.0848	1.01656	50.0835	4.98514	32.6692
0.00142363	-1.02881	0.00416025	-0.445078	-4.81526	834.417	5.6753	22.0881	-185.588	2.99566e+08	0.652194	1.39451	82.8846	2.71012	51.0466
0.00697293	-1.02922	0.0235513	-0.65774	-4.14865	871.795	5.14223	17.0903	-184.122	1.73784e+09	13.6952	1.17403	125.636	3.63274	15.1205
0.00117934	-1.02385	0.000444798	-0.892575	-4.37096	252.86	6.51864	6.9658	-185.621	5.46135e+06	7.06094	1.04981	50.2591	3.16533	18.6943
0.00435147	-1.03038	3.70275e-05	-0.0126922	-4.21867	45.26	4.29059	3.29852	-186.647	2.53282e+08	15.6701	0.740604	59.3116	3.14133	42.6029
0.00866544	-1.02633	0.00180019	-0.0671411	-4.18077	1546.52	4.73978	1.91209	-186.203	6.48905e+08	22.3386	1.57102	44.1832	3.82849	8.9611
0.00146567	-1.03126	0.100486	-0.182457	-4.09716	359.238	9.77197	8.137	-185.74	7.5179e+08	45.3644	1.50441	29.5771	4.26559	4.98028
0.00116153	-1.02396	0.469698	-0.702921	-4.33757	68.0949	4.30429	21.8924	-184.032	52208.4	7.3403	0.773849	32.9432	4.22304	63.9734
0.000223735	-1.02838	1.11441	-0.711199	-3.76512	904.88	5.46489	4.26696	-177.829	3.68415e+08	43.9392	0.0509299	78.2835	3.16395	4.54859
0.00606661	-1.02759	0.0864087	-0.922293	-3.81789	698.731	2.96186	22.0733	-184.379	5.09475e+08	0.624032	0.205038	58.7187	3.50755	21.245
0.00484812	-1.03127	3.58531e-06	-0.620966	-4.05748	436.023	8.34151	14.4157	-185.484	2.57629e+09	18.1424	0.577946	373.199	3.26615	12.1719
0.00582257	-1.00482	0.657516	-0.623742	-3.6556	1215.96	7.56489	36.8837	-184.896	9.98993e+08	25.9634	0.297442	142.958	3.07679	56.5322
0.00112019	-1.02926	0.00082296	-0.726344	-3.61323	117.514	3.57019	10.9495	-186.371	6.33907e+08	31.0499	0.305358	40.0067	4.08774	15.9303
0.0112469	-1.02371	0.0754202	-0.810474	-3.65358	1265.24	1.01941	6.292	-186.465	1.37914e+08	0.969253	0.600895	29.71	3.44179	35.3662
0.00665609	-1.03087	2.30593	-0.496322	-4.15872	86.0303	1.42808	8.96388	-185.831	1.05957e+09	60.4168	0.300881	41.676	3.46448	36.2795
0.00150102	-1.02693	1.04821e-06	-0.696769	-4.33695	539.699	1.98432	17.7733	-186.49	9.47894e+07	121.664	0.621241	35.4676	5.62374	24.8808
0.000172935	-1.02078	0.163606	-0.855788	-3.63095	199.605	5.01845	5.2069	-186.415	8.20537e+08	10.4218	0.125097	119.076	5.26999	11.7771
0.00597538	-1.0102	1.22438	-0.469998	-3.92752	792.485	8.83924	21.1469	-183.244	1.01046e+09	45.9012	1.03748	32.7844	5.60603	27.9726
0.00404059	-1.02046	0.00621247	-0.978437	-4.24158	0.00584043	6.80051	37.1051	-185.671	3.74676e+08	16.369	0.708515	162.939	4.27636	33.3544
0.00040104	-1.01676	0.118221	-0.0681229	-4.01141	655.982	7.66987	12.8227	-183.651	5.95621e+08	14.1167	0.82237	130.789	4.75479	14.1793
0.00523739	-1.02587	0.743003	-0.245212	-4.02896	1083.55	2.74842	9.0308	-185.373	3.05556e+08	7.35445	1.27701	33.555	3.12989	42.1294
0.00241057	-1.02425	0.00290607	-0.349033	-4.02224	401.692	5.95915	11.7054	-186.554	3.86797e+08	20.9826	0.966038	169.702	3.15544	0.0469128
0.00809992	-1.01812	0.689721	-0.887713	-4.71639	1469.56	8.40056	1.42649	-185.626	1.80986e+09	64.6466	0.614512	32.6489	3.60509	42.412
0.00448904	-1.02625	0.058819	-0.643274	-4.3485	4.28619	3.2865	9.62715	-184.609	9.39445e+07	36.5879	1.12345	44.6283	3.19325	3.72087
0.00262129	-1.02295	0.824611	-0.116392	-3.75114	82.2207	7.97631	3.07152	-184.536	1.02534e+09	31.6042	0.362372	53.8021	4.10993	20.6749
0.014488	-1.01881	1.82976e-05	-0.111407	-4.25405	1067.75	0.0301775	0.99658	-179.924	4.44436e+07	1.0043	0.988009	43.0992	3.00536	27.2989
0.00594243	-1.02196	0.00938423	-8.09781e-05	-3.45535	18.0847	8.46944	10.6488	-184.473	1.85049e+08	1.38664	0.617095	31.5018	4.19478	41.4959
0.0003394	-1.00878	0.000134079	-0.051731	-3.3435	1174.89	2.81729	7.66856	-181.381	8.69759e+08	2.32217	0.505475	44.6471	4.206	37.3385
0.00360759	-1.02283	0.0556858	-0.849409	-3.66589	1076.77	4.55465	20.3049	-186.706	1.26596e+08	19.7117	0.929561	29.969	9.09756	22.1946
0.00424218	-1.02972	0.853012	-0.407605	-4.10205	477.691	4.2871	16.4291	-186.46	2.3404e+08	0.776216	0.797932	44.6736	3.0794	18.5038
0.00521996	-1.02231	0.0305201	-0.793881	-4.08536	627.094	3.32715	8.81265	-186.491	9.66214e+08	22.4151	0.386394	82.9101	3.95076	11.4305
0.00463237	-1.01152	0.00133071	-7.75354e-05	-3.8113	1610.83	4.93162	32.1011	-186.449	3.9045e+09	8.55197	0.437633	53.4282	4.87625	23.9533
0.000136618	-1.03147	0.00905015	-0.999508	-4.33869	2023.75	5.2324	8.02294	-184.164	7.97141e+08	105.018	0.0298604	50.8019	4.18952	38.8946
0.0051432	-1.02033	0.0165385	-7.2635e-05	-4.32001	1119.35	1.65718	10.2198	-184.645	6.02691e+08	4.17953	0.686433	66.7086	3.31647	29.5259
0.00736266	-1.01169	1.43779e-06	-0.327327	-4.05114	921.82	6.68293	0.996403	-181.484	2.36515e+08	2.17263	1.33848	66.953	4.21139	5.95568
0.000851852	-1.00878	0.0547505	-0.0405059	-4.49956	225.265	5.90548	6.88623	-184.734	4.03527e+08	0.827839	0.567783	147.252	3.34924	6.84534
0.0142259	-1.02583	0.241365	-0.25657	-4.88251	25.7868	0.670306	38.8358	-183.373	8.61703e+07	7.79524	0.717112	94.7375	4.04804	5.05517
0.00112362	-1.03068	3.26531	-0.012739	-3.86446	3850.71	4.45851	13.4718	-186.5	2.82015e+08	0.769892	1.29011	64.1011	3.25847	45.7359
0.00214443	-0.980049	0.835931	-0.175534	-3.9549	25.0824	5.08938	9.27349	-185.001	2.16969e+09	1.35362	0.278449	60.0585	6.24722	11.8555
0.00215352	-1.02856	0.0535089	-0.900563	-4.40453	56.2991	5.90568	8.99376	-185.316	2.25427e+07	2.6164	1.23583	58.4759	3.3358	1.52577
0.00884994	-1.02761	0.0777931	-0.935668	-4.01654	444.044	4.4357	22.9038	-184.982	5.04647e+07	28.1767	0.779701	34.365	3.55862	39.8534
0.00407203	-1.02192	3.09516	-0.104224	-3.813	312.84	4.93489	10.4552	-186.567	5.90344e+08	14.2116	1.05618	61.0492	3.04918	36.2261
0.00556864	-1.03116	0.258825	-0.82669	-4.38846	82.953	7.8653	25.8508	-185.611	1.8048e+08	10.8357	0.47761	102.78	3.96646	54.767
0.00519817	-1.02897	0.331018	-0.627027	-4.73709	1378.57	5.38568	2.4428	-185.808	2.45648e+09	39.5962	1.46824	31.651	5.22378	43.4257
0.00243545	-1.02878	0.869845	-0.250159	-4.61683	643.621	4.98682	2.69019	-184.521	3.67335e+08	38.7604	0.419099	33.7704	4.4746	55.9093
0.00040794	-1.01151	0.0723178	-0.896134	-4.17446	1043.5	3.93157	20.169	-185.789	1.78406e+08	8.9781	0.355719	47.6633	4.1917	22.7037
0.00512884	-1.00912	0.751437	-0.43072	-3.80905	2434.01	0.687458	23.916	-185.875	5.11115e+06	2.90175	1.25282	85.6606	4.16273	0.343337
0.000606589	-1.03054	1.03393	-0.996375	-5.42824	1114.04	5.68956	3.27505	-186.092	5.81013e+08	18.5026	0.376963	33.7891	6.14046	28.1117
0.00334259	-1.02926	1.02995	-0.0704721	-4.28047	311.591	6.69101	26.2462	-185.814	3.36057e+08	1.48378	0.3768	45.3384	3.31626	50.5201
0.00117857	-1.02692	0.0622945	-0.395097	-5.22413	45.6522	4.91314	15.0355	-186.528	1.66184e+08	39.0622	0.818614	40.3076	6.49953	16.1284
0.0172107	-1.01779	0.303474	-0.982831	-4.12652	133.499	6.66643	24.5614	-184.386	5.22803e+08	31.7682	0.921956	46.6609	6.7612	36.1993
0.000996572	-1.02515	0.00849962	-0.455202	-4.13247	730.903	5.94787	1.58407	-186.502	2.04994e+08	75.8106	0.766613	40.6031	2.93659	24.1684
0.00261694	-1.02896	0.0206696	-0.051694	-4.35323	648.653	7.47103	26.2828	-185.858	1.8079e+08	35.0081	0.438036	200.113	3.24582	23.3207
0.0046686	-1.03086	0.321791	-0.999734	-4.0149	416.211	6.39766	9.66519	-184.136	1.01987e+09	12.2774	0.556842	29.0176	5.40382	12.7987
0.00105723	-1.01292	0.227866	-0.607458	-3.39748	1549.36	1.3317	9.66866	-186.65	9.77623e+08	5.95075	0.296084	31.1449	3.48336	38.4622
0.00109755	-1.02167	0.00853135	-0.973951	-4.04634	103.377	4.59504	17.2381	-186.332	1.02979e+09	5.51735	2.30355	57.6898	3.74527	12.3642
0.00580702	-1.03098	0.163056	-0.464534	-4.27808	1498.55	5.50596	25.2379	-186.101	7.85069e+06	1.06387	0.781436	134.045	3.13201	14.7844
0.00169066	-1.01735	0.0785365	-0.883295	-3.79772	568.353	2.87458	31.5081	-186.62	1.1943e+09	84.223	0.94295	39.3841	3.38341	6.79454
0.00273997	-1.03146	0.560818	-0.453146	-4.97326	37.679	2.89126	9.03477	-186.528	1.15128e+09	47.902	0.913493	56.211	7.64732	67.7331
0.00561937	-1.02697	0.00962563	-0.97838	-4.46238	140.636	2.86743	7.59866	-185.712	2.10136e+08	2.06362	0.769474	75.4359	5.01436	8.80052
0.00164624	-1.02432	0.00471439	-0.0181891	-4.21329	486.151	5.79765	17.6094	-186.004	3.30227e+08	30.877	0.162207	134.933	5.36782	78.7992
0.00244093	-1.0312	0.464851	-0.770807	-4.26498	1983.02	4.33076	14.5563	-185.352	2.41288e+09	69.0711	1.17296	62.5341	5.34986	13.7008
0.00421791	-1.02641	0.176137	-0.00997624	-4.66335	144.273	3.49328	14.0405	-186.01	1.2173e+09	35.4606	0.292939	106.464	6.88921	17.4974
0.000999144	-1.03001	0.150465	-0.409269	-3.15469	203.937	9.85217	10.5677	-183.275	3.88837e+08	35.5445	0.582354	118.322	3.18831	5.64777
0.00580755	-1.01492	0.0505237	-0.113873	-4.10107	576.745	3.77889	17.9024	-186.205	1.36225e+08	11.6538	1.04332	29.3115	4.21278	31.2086
0.00980398	-1.02913	0.233091	-0.130634	-3.99627	261.306	0.673914	4.1406	-185.071	4.31465e+08	16.6073	0.6948	85.3328	6.00087	44.6267
0.0139869	-1.02927	0.000986159	-0.785637	-4.33209	488.033	3.67287	19.2486	-184.089	5.5195e+08	76.6553	0.419275	102.61	4.05353	59.2613
0.00332695	-1.0299	0.330186	-0.997124	-4.26289	472.508	8.47292	21.0292	-186.491	1.05201e+07	4.9351	0.07511	57.7825	3.1859	44.2542
0.001283	-1.02618	0.00443294	-0.335238	-3.77078	1255.28	0.659025	8.44457	-186.725	2.01312e+09	0.719545	0.215832	40.3536	3.10563	7.15268
0.00147332	-1.02094	3.04147	-0.295368	-4.39579	3810.42	6.73811	11.6956	-185.135	3.95787e+08	0.580533	0.406654	92.0005	4.47045	23.3763
0.00389971	-1.01872	0.921828	-0.299778	-4.69186	599.954	1.71642	12.5373	-186.41	6.3968e+08	2.46929	0.311956	30.0178	3.34384	23.6188
0.00562686	-1.03136	0.00314397	-0.975303	-3.84201	752.453	8.02091	19.0658	-186.058	4.44866e+07	17.2951	0.605684	35.2953	4.64768	29.3366
0.0071196	-1.00446	0.00467928	-0.963298	-4.74829	38.606	3.54602	17.0351	-186.107	1.2501e+07	13.8932	0.591351	183.703	2.85772	44.9954
0.0119196	-1.02254	0.143136	-0.378201	-4.01789	192.574	2.41083	7.98111	-181.418	1.32441e+09	9.1127	0.329025	111.506	3.12069	26.3702
0.00112418	-1.03147	0.483232	-0.985432	-4.52483	348.96	4.79376	15.2326	-183.77	9.30841e+08	3.37021	1.31325	40.4683	4.80271	7.15928
0.000565689	-1.01487	1.24304	-0.147491	-3.61847	8.20912	8.26599	29.1682	-185.793	1.02709e+09	12.0078	0.107551	30.0142	3.89163	20.0954
8.93557e-05	-1.01948	2.73433	-0.0317152	-3.85488	605.899	3.71967	8.99837	-184.101	3.74247e+08	9.48725	0.0109189	54.8091	5.79941	23.5066
0.00388396	-1.02376	0.139761	-6.48809e-05	-4.80823	4159.7	1.28564	0.0441072	-183.633	4.84295e+08	25.5217	0.786045	30.289	3.46097	22.6315
1.50587e-05	-1.02703	0.800665	-0.33501	-3.88045	209.572	5.91083	10.4558	-185.118	2.43585e+09	24.2027	1.25792	48.8223	4.17056	18.0775
0.00040419	-1.02164	0.115811	-0.485421	-3.91722	1900.46	2.98211	9.57369	-184.192	321004	33.1876	0.749306	52.8565	2.76552	47.2393
0.00411217	-1.0298	0.00414521	-0.90667	-4.15923	71.4497	0.673027	4.34414	-186.001	1.37431e+09	0.870214	0.525918	88.0438	3.52369	38.594
0.00242162	-1.02849	0.169034	-0.426983	-4.32225	593.503	4.92794	11.9553	-184.983	7.77165e+08	13.0831	1.16914	33.798	4.62321	8.72732
8.27067e-05	-1.02488	0.0705867	-0.0949614	-4.44051	307.172	4.44405	6.43776	-185.435	2.13569e+09	6.27436	0.591968	32.7233	3.04622	35.0785
0.00994547	-1.0209	0.00124388	-0.2119	-3.87314	1068.31	1.18311	9.6125	-184.412	8.85695e+08	7.50142	1.27195	58.9558	3.14986	23.593
0.00188475	-1.02624	0.119165	-0.641711	-4.21058	15.356	2.04658	11.0745	-186.152	1.8756e+08	39.1855	0.707003	33.7538	4.19318	13.6406
0.000696984	-1.01411	0.19008	-0.761498	-3.84909	94.4515	2.21059	2.9499	-186.294	2.17861e+08	62.978	0.952012	72.7941	4.12794	29.8394
0.000699505	-1.01654	1.36961	-0.3192	-3.99352	4378.88	2.40092	23.9472	-186.568	2.33255e+08	8.47876	1.23391	40.5457	6.64484	5.08604
0.0123423	-1.02558	0.0822094	-0.0906215	-3.95282	35.7226	4.43481	1.76618	-184.828	4.85611e+08	39.4691	0.194135	39.9897	2.76171	18.5869
