# Supplementary material for: Flood algorithm: a novel metaheuristic algorithm for optimization problems
Source: PeerJ Comput Sci. 2024 Oct 2;10:e2278. doi: 10.7717/peerj-cs.2278 (PMC11623059; doi:10.7717/peerj-cs.2278)
Supplement: Supplemental Information 8 [file peerj-cs-10-2278-s008.xlsx]

## Sheet: Sheet1
beale	sixhump camelback	quatric	easom	michalewicz	sphere	ackley	rastrigin	shubert	bentcigar	hgbat	griewank	rosenbrock	levy	Zakharov
4.9491e-13	-1.03163	0.262616	-1	-9.03514	4241.21	7.60628	114.831	-186.731	1.8202e+09	39.5693	1.30676	112.408	8.84442	703.413
1.33703e-12	-1.03163	0.599801	-1	-7.1456	2239.69	10.1809	109.161	-186.731	1.61653e+09	38.6678	1.34797	144.194	4.21148	451.318
6.42308e-13	-1.03163	0.128095	-1	-8.13191	2765.13	9.36494	130.859	-186.731	1.64457e+09	44.1227	1.50607	123.283	8.7119	343.641
3.72178e-13	-1.03163	0.945389	-1	-6.88271	3786.77	6.95262	82.8536	-186.731	2.86763e+09	89.5647	1.36773	111.491	6.96086	473.862
4.63507e-12	-1.03163	0.388976	-1	-7.37966	8637.56	11.2329	100.982	-186.731	3.54129e+09	44.7823	1.39992	178.593	11.5592	236.027
2.78823e-12	-1.03163	0.710641	-1	-6.42031	2594.77	15.001	141.65	-186.731	2.08957e+09	46.2076	1.4535	86.273	9.36064	273.212
9.21415e-14	-1.03163	0.12031	-1	-6.88093	2012.43	12.0315	113.755	-186.731	9.77869e+08	91.463	1.3032	93.8736	16.067	778.518
1.04637e-12	-1.03163	0.0891174	-1	-6.54019	2664.68	12.7138	108.74	-186.731	7.62173e+08	48.4491	1.22447	154.112	14.4292	294.559
1.94814e-12	-1.03163	0.55801	-1	-7.31248	1444.7	9.77991	110.555	-186.731	1.8667e+09	66.2592	1.25164	101.638	9.82413	429.742
4.06494e-13	-1.03163	0.330272	-1	-6.5444	2815.39	9.85824	134.278	-186.731	9.29559e+08	102.038	1.23788	171.727	6.80119	649.535
6.19341e-13	-1.03163	0.330185	-1	-5.83331	626.074	11.168	125.125	-186.731	1.58792e+09	49.7794	1.29854	90.4789	11.5525	629.908
5.45622e-13	-1.03163	0.366446	-1	-7.01257	3146.97	10.2076	111.024	-186.731	1.42549e+09	25.4579	1.50084	115.38	18.2923	402.961
1.48755e-13	-1.03163	0.282891	-1	-8.39627	1038.63	10.951	101.708	-186.731	2.05756e+09	24.0407	1.39256	188.784	6.1961	494.736
4.96065e-14	-1.03163	0.0658488	-1	-7.0021	1126.7	9.48801	87.8711	-186.731	8.80712e+08	35.3556	1.39351	156.314	21.7561	597.085
9.23218e-14	-1.03163	0.490936	-1	-8.29449	2105.71	10.4937	127.495	-186.731	2.04364e+09	37.9739	1.60239	81.9897	20.3531	351.39
5.37216e-13	-1.03163	0.123956	-1	-6.67675	2326.39	9.47049	76.195	-186.731	2.04759e+09	67.9044	1.18196	147.541	5.87311	620.657
5.32812e-15	-1.03163	0.264473	-1	-6.46705	1972.15	8.35909	105.509	-186.731	3.84927e+09	47.0118	1.37579	96.4149	9.70589	543.203
1.33606e-12	-1.03163	0.62743	-1	-6.06698	3638.14	10.2885	143.335	-186.731	3.06656e+08	44.8164	1.60761	113.417	8.52734	385.514
3.86239e-13	-1.03163	0.201586	-1	-7.61465	2904.09	9.08988	99.7029	-186.731	3.72779e+09	40.3759	1.42622	129.342	9.22993	266.178
3.70191e-13	-1.03163	0.412613	-1	-8.66783	1423.98	11.5304	136.05	-186.731	1.82416e+09	58.8419	1.20233	138.492	5.74525	463.55
2.22825e-11	-1.03163	0.868098	-1	-6.84437	2630.84	10.3792	167.105	-186.731	8.70112e+08	37.6478	1.64117	97.808	11.033	467.727
1.48699e-12	-1.03163	0.257256	-1	-8.12912	2232.19	9.44984	197.956	-186.731	1.77591e+09	26.1399	1.99376	236.537	7.70959	341.153
7.35719e-14	-1.03163	1.05318	-1	-6.85014	1748.62	9.4921	151.251	-186.731	1.61532e+09	46.8915	2.28877	110.594	5.69448	431.256
2.90442e-13	-1.03163	0.0821514	-1	-7.90836	1379.31	10.0707	144.064	-186.731	2.18455e+09	20.6036	1.2419	124.846	5.57866	561.861
3.90047e-12	-1.03163	0.162505	-1	-7.22567	3936.65	8.77764	106.044	-186.731	3.39964e+09	39.9136	1.25095	132.814	13.7957	424.401
5.08677e-12	-1.03163	0.102012	-1	-7.65437	2592.06	7.55302	138.35	-186.731	3.08722e+09	48.8644	1.43603	153.954	6.66524	550.015
4.27576e-12	-1.03163	0.0330559	-1	-7.49288	1167.43	10.5732	116.511	-186.731	2.55873e+09	27.7696	1.60496	104.42	12.5841	481.704
1.18006e-13	-1.03163	0.573944	-1	-6.56394	1219.14	11.1241	75.8263	-186.731	2.52799e+09	48.5592	1.23424	95.607	9.36707	295.09
5.54714e-14	-1.03163	0.217967	-1	-7.50465	2223.43	9.88236	99.2578	-186.731	9.91132e+08	71.0214	1.28664	199.08	7.18603	547.537
1.22914e-12	-1.03163	0.227005	-1	-5.9088	1490.47	9.52699	103.755	-186.731	2.35178e+09	37.7643	1.42544	177.388	8.95773	484.523
1.44744e-14	-1.03163	0.181678	-1	-7.81445	1683.82	8.55045	101.645	-186.731	1.73032e+09	23.2974	1.50755	156.499	3.16008	553.351
2.32829e-12	-1.03163	0.617192	-1	-7.75945	1945.15	8.13991	136.271	-186.731	2.5607e+09	49.4817	1.43783	109.726	17.1903	474.202
1.08859e-12	-1.03163	0.507389	-1	-7.86662	3375.96	8.52053	96.4813	-186.731	1.56465e+09	19.0474	1.30045	123.38	12.032	453.172
1.25587e-13	-1.03163	0.12584	-1	-8.23983	1922.52	8.62673	121.588	-186.731	1.6116e+09	26.1223	1.36657	109.993	8.83329	588.699
4.24693e-13	-1.03163	0.112842	-1	-6.09013	3358.47	9.7444	137.316	-186.731	1.03387e+09	19.7557	1.38542	99.1878	19.9965	440.118
3.31962e-13	-1.03163	0.188909	-1	-7.02314	1149.39	9.91643	101.888	-186.731	1.52296e+09	45.3872	1.42647	190.234	5.57348	389.771
5.34635e-13	-1.03163	0.0929524	-1	-7.67947	4992.82	10.3226	188.96	-186.731	1.63727e+09	59.6929	1.2142	134.435	10.4658	509.531
3.01181e-13	-1.03163	0.279296	-1	-6.4847	1763.05	9.8765	101.289	-186.731	1.88411e+09	47.0619	1.9363	133.706	4.88869	559.167
3.47564e-13	-1.03163	0.381169	-1	-6.12413	1386.91	9.83876	126.986	-186.731	9.1495e+08	24.929	1.57421	129.024	25.0776	945.659
8.44809e-13	-1.03163	0.215134	-1	-7.49361	2867.5	8.43342	118.183	-186.731	5.91545e+08	25.338	1.59562	172.485	16.7771	297.588
1.06693e-13	-1.03163	0.189763	-1	-6.42593	3465.72	8.26173	78.9573	-186.731	3.06287e+09	50.7747	1.56451	104.608	4.48855	681.598
2.20828e-12	-1.03163	0.337651	-1	-6.90126	874.287	8.12587	71.9958	-186.731	2.16088e+09	34.4482	1.58522	101.155	5.54589	395.381
1.20853e-12	-1.03163	0.161698	-1	-8.0499	1861.74	8.13066	164.999	-186.731	1.95345e+09	65.9834	1.43549	103.977	14.5638	351.357
5.72881e-12	-1.03163	0.110281	-1	-7.27778	1829.54	9.17097	90.9578	-186.731	2.38144e+09	16.615	1.30182	81.866	15.3181	293.633
1.10049e-12	-1.03163	0.558163	-1	-7.63489	1992.31	9.98636	140.921	-186.731	1.3472e+09	24.357	1.46162	145.261	13.8218	336.558
1.37366e-11	-1.03163	0.165348	-1	-6.41723	1897.9	12.1401	125.58	-186.731	1.25675e+09	61.7371	1.40833	114.698	5.29555	700.393
3.41659e-12	-1.03163	0.11506	-1	-5.53754	2732.9	10.6875	113.775	-186.731	1.05868e+09	55.144	1.89363	159.735	9.12041	629.275
1.12703e-13	-1.03163	0.240382	-1	-6.65601	2861.13	11.5163	131.972	-186.731	3.11576e+09	44.353	1.29232	218.792	9.37053	621.812
6.09315e-14	-1.03163	0.0736063	-1	-5.83493	622.356	7.60421	100.168	-186.731	2.70487e+09	59.5553	1.96158	75.2296	9.89899	285.545
5.98762e-13	-1.03163	0.197149	-1	-7.20198	3624.32	9.54054	121.71	-184.726	2.10805e+09	63.3962	1.78077	205.512	10.1398	632.396
1.47961e-12	-1.03163	0.513432	-1	-6.3765	1754.51	11.9737	123.638	-186.731	1.84024e+09	42.63	1.27505	155.012	14.8334	609.047
7.7303e-13	-1.03163	0.191866	-1	-6.8773	1898.64	9.20814	118.593	-186.731	8.06892e+08	55.7623	1.50254	129.426	8.19185	412.16
2.00814e-12	-1.03163	0.195754	-1	-5.68886	1957.56	11.2613	96.9115	-186.731	1.90525e+09	55.6341	1.78657	113.434	14.5965	309.048
6.99135e-13	-1.03163	0.526907	-1	-6.42478	2058.72	7.8134	83.6668	-186.731	2.05573e+09	46.0068	1.44908	138.595	9.80996	632.078
1.0618e-12	-1.03163	0.538044	-1	-5.59651	1120.03	10.6167	113.884	-186.731	8.31951e+08	57.693	1.5489	160.631	4.22908	504.319
3.12486e-13	-1.03163	0.596939	-1	-6.56743	1920.92	9.3463	70.9563	-186.731	1.91674e+09	23.3508	1.8208	97.5213	9.17119	393.981
1.17172e-11	-1.03163	0.354532	-1	-6.95562	2058.42	10.7887	101.128	-186.731	2.02457e+09	42.8712	1.68501	115.814	6.84975	612.286
2.61789e-12	-1.03163	0.129181	-1	-5.62427	2316.35	9.97625	118.937	-186.731	6.99125e+08	52.5087	1.83913	162.604	8.1087	730.904
1.75595e-12	-1.03163	0.305219	-1	-6.32505	1142.11	11.1528	103.021	-186.731	8.43191e+08	54.4696	1.36451	105.721	2.76984	401.364
1.1126e-13	-1.03163	0.160972	-1	-8.19432	1556.98	9.58713	116.001	-186.731	1.98149e+09	28.0493	1.74922	164.865	16.224	852.487
3.36394e-12	-1.03163	0.268493	-1	-5.74741	1548.94	11.2092	144.447	-186.731	1.35535e+09	47.7291	1.59222	120.374	15.3146	545.071
4.73599e-14	-1.03163	0.720951	-1	-6.0477	906.816	6.03736	93.0035	-186.731	2.07274e+09	33.8315	1.49315	220.421	14.1714	335.669
6.49561e-13	-1.03163	0.444414	-1	-6.76436	3287.02	9.52876	142.609	-186.731	9.13041e+08	67.6247	1.39986	100.898	7.21594	429.384
4.01727e-13	-1.03163	0.116101	-1	-6.35825	1999.44	9.03484	88.7711	-186.731	7.45245e+08	24.6403	1.29058	94.0982	17.6222	651.692
2.37483e-12	-1.03163	0.447464	-1	-7.38795	1466.27	11.5203	135.069	-186.731	1.46505e+09	46.7288	1.69204	98.4818	5.00218	427.896
7.37236e-13	-1.03163	1.08079	-1	-7.02777	1753.3	8.32515	101.187	-186.731	2.77691e+09	84.6371	1.57049	175.971	11.3465	629.313
3.98122e-13	-1.03163	0.765493	-1	-6.15451	1607.74	11.0229	138.216	-186.731	3.03265e+09	39.4476	1.50672	119.975	14.0728	406.406
1.54628e-12	-1.03163	0.0357927	-1	-6.55596	768.942	12.5525	100.01	-186.731	1.31829e+09	115.693	1.30346	109.941	5.50743	429.009
1.90029e-12	-1.03163	0.23613	-1	-5.95426	1934.27	11.2624	102.23	-186.731	1.57419e+09	23.164	1.45722	166.192	6.98241	363.668
5.09784e-12	-1.03163	0.300893	-1	-8.21359	1482.69	11.0509	136.114	-186.731	2.11623e+09	31.041	1.80198	112.285	8.59224	699.668
1.22816e-12	-1.03163	0.167839	-1	-7.8684	2019.05	9.84604	108.504	-186.731	1.05599e+09	64.9815	1.84717	137.835	20.2619	337.436
1.79175e-12	-1.03163	0.388047	-1	-7.46202	1819.19	10.8996	113.531	-186.731	1.05275e+09	19.172	1.38337	121.442	5.57063	784.371
6.10312e-13	-1.03163	0.353524	-1	-6.42376	2089.08	11.224	79.7801	-186.731	1.66906e+09	47.5275	1.67296	154.007	8.27166	667.075
5.83356e-12	-1.03163	0.259882	-1	-5.77357	1000.76	10.7976	113.816	-186.731	2.67111e+09	104.87	1.43343	135.305	15.0206	538.615
3.0444e-13	-1.03163	0.188533	-1	-7.68798	1665.34	10.706	136.175	-186.731	1.48806e+09	18.4803	1.64662	137.768	11.1962	447.789
7.13875e-12	-1.03163	0.179471	-1	-7.11575	2388.11	9.16888	119.772	-186.731	1.99311e+09	32.8757	1.51492	105.362	11.4061	708.62
5.5472e-14	-1.03163	0.79718	-1	-7.02591	1228.5	8.36398	99.6295	-186.731	3.27979e+09	60.5195	1.39582	122.248	5.35257	557.424
1.76821e-12	-1.03163	0.681461	-1	-7.32445	1553.06	10.1343	156.487	-186.731	2.61267e+09	65.2062	1.40554	148.839	10.9998	278.634
3.0584e-13	-1.03163	0.13169	-1	-7.45615	2732.93	13.3881	171.101	-186.731	1.57688e+09	17.5588	1.50937	163.385	28.6864	628.908
4.58249e-13	-1.03163	1.62016	-1	-7.00358	625.891	10.9488	123.767	-186.731	1.39527e+09	37.1515	1.58846	173.05	13.1676	497.901
2.23464e-13	-1.03163	0.433029	-1	-7.35348	6062.14	8.33674	118.881	-186.731	3.96851e+09	53.1465	1.2602	222.009	7.66107	378.329
1.38128e-13	-1.03163	0.121119	-1	-6.26988	2416.92	10.217	90.4696	-186.731	1.56005e+09	34.9229	2.01522	177.502	5.08727	554.346
3.59742e-11	-1.03163	0.277127	-1	-6.58292	2156.94	10.8771	144.924	-186.731	5.60149e+08	35.9282	1.47102	88.5058	5.65231	378.777
6.05238e-12	-1.03163	0.197805	-1	-8.19517	2806.83	8.90372	108.491	-186.731	8.81961e+08	11.3754	1.40348	160.332	6.59407	438.414
4.84569e-13	-1.03163	0.167298	-1	-7.52899	1450.57	11.2787	106.188	-186.731	2.46736e+09	46.5683	1.52699	77.7509	10.8429	369.681
3.88161e-12	-1.03163	0.157401	-1	-7.7635	2261.59	10.2768	90.0626	-186.731	3.02478e+09	33.9783	1.92011	119.712	10.814	728.344
1.41832e-13	-1.03163	0.461155	-1	-6.71744	2403.57	10.8605	104.582	-186.731	2.1639e+09	39.7216	1.37572	170.472	17.0119	646.777
2.63943e-11	-1.03163	0.380458	-1	-6.58385	1410.32	8.26561	152.232	-186.731	2.0525e+09	33.5651	1.70961	125.404	4.84675	425.86
0.735041	-1.03163	0.410494	-1	-7.37566	1304.71	8.51404	136.886	-186.731	2.30294e+09	88.5426	1.74907	120.688	13.4669	400.338
9.09242e-14	-1.03163	1.52337	-1	-6.88481	2368.63	10.2966	116.61	-186.731	1.90673e+09	31.6859	1.21671	96.4951	10.2142	385.703
2.36513e-13	-1.03163	0.25067	-1	-5.74811	2060.67	9.60262	96.5284	-186.731	2.23587e+09	52.0878	1.3807	105.829	5.48116	404.712
1.27697e-13	-1.03163	0.320156	-1	-6.13087	664.966	8.79617	100.814	-186.731	1.80909e+09	33.619	1.34015	150.496	8.26227	616.773
8.41486e-15	-1.03163	0.217303	-1	-8.14007	4075.41	11.0885	102.866	-186.731	2.14493e+09	30.1713	1.68811	154.405	2.55252	328.026
1.91276e-13	-1.03163	0.833543	-1	-6.89797	2979.28	8.25275	124.56	-186.731	1.22497e+09	36.1791	1.21987	159.26	12.0685	628.253
2.36336e-12	-1.03163	0.184928	-1	-6.03243	1593.2	7.08171	104.439	-186.731	1.1581e+09	47.4824	1.33126	77.5557	7.51177	525.794
4.11943e-13	-1.03163	0.585634	-1	-6.47794	1538.86	11.4921	150.644	-186.731	9.91205e+08	42.597	1.64873	104.232	29.7145	351.785
3.39239e-12	-1.03163	0.337411	-1	-7.94401	2423.92	9.48037	107.765	-186.731	1.27752e+09	69.873	2.21168	120.835	5.47334	540.547
1.00673e-14	-1.03163	0.462268	-1	-6.52593	2348.69	11.2659	82.8888	-186.731	2.38477e+09	30.3506	1.62557	186.197	11.626	278.729
4.69394e-14	-1.03163	0.198051	-1	-5.02452	1898.43	6.62522	94.5432	-186.731	2.07259e+09	36.1226	1.50687	93.4258	20.1869	381.99
2.05683e-12	-1.03163	0.275251	-1	-6.81934	1799.58	8.73387	134.208	-186.731	9.58527e+08	31.0955	1.80694	144.986	18.29	744.135
