# Supplementary material for: Flood algorithm: a novel metaheuristic algorithm for optimization problems
Source: PeerJ Comput Sci. 2024 Oct 2;10:e2278. doi: 10.7717/peerj-cs.2278 (PMC11623059; doi:10.7717/peerj-cs.2278)
Supplement: Supplemental Information 9 [file peerj-cs-10-2278-s009.xlsx]

## Sheet: Sheet1
beale	sixhump camelback	quatric	easom	michalewicz	sphere	ackley	rastrigin	shubert	bentcigar	hgbat	griewank	rosenbrock	levy	Zakharov
0.836793	-1.0316	0.00064844	-0.956181	-9.63601	4.17815	1.48282	2.96429	-186.73	3.87915e+06	0.474951	0.313684	27.4746	0.0242678	297.403
1.93149	-1.0316	0.00080156	-0.999112	-9.65306	3.88167	1.66349	2.26355	-186.718	3.36926e+06	0.485827	0.362964	27.5006	0.0156397	350.749
0.00344664	-1.03162	0.000976302	-0.000319381	-9.65197	4.3624	1.11415	1.8911	-186.73	6.68692e+06	0.394445	0.343681	139.051	0.0139778	304.086
0.00544528	-1.03163	0.000474444	-0.130951	-9.64699	3.20729	1.27734	4.16324	-186.726	1.21364e+07	0.415174	0.421347	76.2287	0.027072	401.039
1.25267	-1.03162	0.000844927	-0.998097	-9.65003	4.87884	0.910438	2.15481	-186.73	5.30735e+06	0.424594	0.272114	67.6819	0.038901	422.323
0.0410521	-1.03162	0.00126389	-0.990303	-9.65085	3.63603	0.896368	1.62681	-186.714	1.05918e+07	0.369503	0.210921	57.7331	0.0250446	457.165
0.0362777	-1.03162	0.000582715	-0.999677	-9.64694	3.08181	0.865712	2.54238	-186.727	5.88007e+06	0.428558	0.55251	24.8978	0.0206802	356.097
0.00068713	-1.0316	0.000518289	-0.993212	-9.63292	3.26542	1.30237	1.47344	-186.676	2.45348e+06	0.372842	0.280749	83.0109	0.0209971	222.036
0.0927913	-1.03157	0.00061943	-0.977528	-9.65491	3.04661	0.991154	2.46183	-186.728	4.09877e+06	0.522413	0.389235	67.7931	0.02065	452.704
0.00290361	-1.03155	0.000264118	-0.997822	-9.63284	3.62903	1.23525	2.68732	-186.73	3.50155e+06	0.389549	0.339223	79.2559	0.0232695	355.866
1.38537	-1.0316	0.000535132	-0.997592	-9.64605	4.69423	1.12738	2.56403	-186.726	9.3708e+06	0.424019	0.354816	90.4898	0.026162	404.878
0.00170831	-1.03159	0.000667945	-0.997689	-9.62985	3.60008	1.55964	2.12959	-186.73	5.44136e+06	0.443839	0.305601	18.4019	0.0188454	393.21
0.00217222	-1.03161	0.000700001	-2.54111e-06	-9.6176	3.85007	1.2301	3.91961	-186.728	3.28524e+06	0.822528	0.324606	12.5512	0.0209588	310.873
0.00400797	-1.03157	0.00045442	-0.996896	-9.63886	3.12515	1.65463	2.53758	-186.724	7.29667e+06	0.404824	0.421415	77.7321	0.0464086	300.075
0.000628409	-1.03157	0.00104168	-0.999949	-9.64437	4.11554	1.08769	1.80321	-186.719	4.45801e+06	1.17976	0.248805	69.1793	0.0244946	280.59
2.00298	-1.03161	0.000932296	-5.71945e-09	-9.64992	3.85674	0.806132	1.29592	-186.73	4.54693e+06	0.399645	0.384474	82.6617	0.0399121	333.828
3.13845	-1.03154	0.00113513	-0.999918	-9.64965	4.40016	1.43971	2.73728	-186.729	7.03438e+06	0.870045	0.279813	18.7458	0.0250125	441.198
0.00691491	-1.03139	0.000622168	-0.999213	-9.63147	4.6644	1.63617	2.48883	-186.73	4.01791e+06	0.362907	0.401138	92.0272	0.0165376	364.785
1.4075	-1.03161	0.000567503	-0.995164	-9.6447	3.09108	0.694111	2.04377	-186.727	4.3772e+06	1.24166	0.35683	82.0966	0.0221531	565.42
0.00250171	-1.03161	0.000596426	-0.999503	-9.65656	1.80394	1.36086	3.43005	-186.718	9.70048e+06	0.40759	0.719329	71.8692	0.0210597	369.117
1.26187	-1.03163	0.00085257	-0.996767	-9.63581	3.01745	1.06132	1.52107	-186.712	1.94975e+06	1.06506	0.44072	19.9616	0.0117704	389.163
0.0198163	-1.03161	0.000446741	-0.995977	-9.65012	2.43227	1.51126	1.37558	-186.728	5.58845e+06	1.20506	0.383994	31.3515	0.0109785	342.088
0.00153628	-1.03163	0.000535193	-0.996534	-9.64748	3.0227	1.00438	2.36481	-186.731	1.26105e+07	1.10085	0.437758	128.815	0.0157542	202.74
0.00475712	-1.0316	0.000542727	-0.999119	-9.63741	3.24526	1.03765	3.88784	-186.728	5.42672e+06	0.722872	0.392433	20.345	0.0218383	254.008
1.17594	-1.03162	0.000623921	-0.991413	-9.64426	3.23463	1.26157	1.04174	-186.729	5.09668e+06	0.469667	0.397576	23.8564	0.0185925	457.995
0.00739709	-1.03161	0.000923673	-0.984048	-9.62317	2.57715	1.78545	3.51612	-186.72	2.30113e+06	1.23378	0.4707	7.06074	0.0165982	261.17
0.00415578	-1.03163	0.000458656	-0.99829	-9.64689	3.34496	1.2662	2.88149	-186.728	6.65549e+06	1.19386	0.364229	75.3398	0.0487927	273.142
7.77145e-06	-1.03163	0.0007506	-0.995675	-9.64973	3.57201	1.77333	2.75066	-186.73	6.20275e+06	0.801933	0.44893	15.0172	0.0359688	326.601
1.77783	-1.03155	0.000589535	-0.999454	-9.64778	4.641	1.46129	1.8315	-186.729	6.3274e+06	0.350754	0.419927	22.8638	0.0237768	257.913
1.22269	-1.03155	0.000791396	-0.990554	-9.64065	4.57535	0.920047	1.86574	-186.731	4.48366e+06	0.950733	0.489115	136.524	0.0230419	406.742
0.00196997	-1.03161	0.000755554	-0.998928	-9.63049	3.78604	1.49987	3.07823	-186.73	6.56115e+06	0.387605	0.490887	79.8639	0.0113182	439.793
0.00283354	-1.0316	0.000665103	-0.998618	-9.65106	3.24821	1.55316	3.22507	-186.73	2.71831e+06	0.417102	0.422029	24.5684	0.0263522	376.948
0.00282547	-1.03155	0.000598856	-0.994953	-9.63471	3.83241	1.33547	2.84474	-186.728	6.02799e+06	0.90543	0.319642	111.436	0.0195444	286.789
0.00107445	-1.03154	0.000755364	-0.964153	-9.64934	2.70664	1.50543	3.82352	-186.729	5.14604e+06	0.363939	0.472338	82.7115	0.0338282	385.707
1.31094	-1.03161	0.000509192	-0.994369	-9.63596	2.35923	1.05856	3.30704	-186.731	5.86347e+06	0.501129	0.432361	81.5828	0.0201389	382.946
0.00580021	-1.0316	0.000615312	-1.55919e-05	-9.63799	2.86363	1.05164	2.89971	-186.725	5.41001e+06	0.401317	0.381767	26.3269	0.0282662	281.712
0.002342	-1.03163	0.000484888	-0.995058	-9.64138	4.15672	0.935233	2.53458	-186.722	6.18584e+06	0.475083	0.394427	128.775	0.039396	327.972
2.15169	-1.03159	0.000267392	-0.993052	-9.61628	3.30083	0.898031	2.03518	-186.73	6.08442e+06	0.974668	0.438898	80.0117	0.0467692	303.727
1.08304	-1.03163	0.000849856	-0.995588	-9.64994	3.12148	1.70877	2.83819	-186.729	6.4992e+06	0.453608	0.591284	19.5253	0.0132118	349.013
0.00238358	-1.0316	0.000941999	-0.99991	-9.64865	3.38224	1.29942	2.90467	-186.725	2.37276e+06	0.462259	0.434799	21.3306	0.0237735	335.731
0.00389601	-1.03162	0.000757066	-0.996814	-9.63867	3.58966	0.976362	2.79618	-186.702	5.02902e+06	0.358126	0.171126	135.382	0.0117423	320.265
1.19318e-05	-1.03161	0.000735621	-0.998048	-9.62813	4.6428	1.11571	2.63414	-186.727	4.04316e+06	0.406037	0.353766	74.8456	0.0279043	387.057
0.782485	-1.03161	0.000815148	-0.996137	-9.61102	3.67988	0.94458	4.65372	-186.729	6.68773e+06	0.400161	0.348153	79.4317	0.0182285	359.403
0.00281271	-1.0316	0.000600242	-0.937143	-9.65212	5.28283	1.89018	1.83531	-186.716	4.16911e+06	0.492554	0.468442	78.3989	0.0226669	425.69
9.40287	-1.03162	0.000674451	-0.999989	-9.64223	1.84536	0.893931	2.65444	-186.729	5.82767e+06	1.06286	0.437901	25.2854	0.0300006	250.286
0.00362833	-1.0316	0.000495836	-0.999935	-9.61831	3.20517	0.838888	2.17613	-186.724	5.65172e+06	0.839279	0.405459	88.2578	0.057415	298.085
0.00374718	-1.03163	0.000210782	-0.99838	-9.6445	3.29946	0.994657	3.3953	-186.728	6.6055e+06	0.514297	0.331027	79.9139	0.0196085	356.449
0.0607483	-1.03161	0.000701657	-0.995955	-9.64801	3.23906	0.8981	2.96217	-186.714	9.18415e+06	1.0231	0.592481	8.30799	0.0301635	326.54
0.00553751	-1.03162	0.00106557	-0.999468	-9.61074	4.57207	1.01819	4.43818	-186.718	3.11612e+06	0.429851	0.36099	80.4002	0.0428008	184.784
1.81444	-1.03159	0.00108247	-0.970929	-9.64919	2.86748	1.42793	2.51974	-186.731	9.32988e+06	1.21264	0.404948	18.7589	0.027901	420.888
0.00297282	-1.03159	0.000550181	-0.991088	-9.64861	3.64592	1.61862	2.90185	-186.731	4.36494e+06	0.391748	0.388505	78.9562	0.0190623	238.246
0.00187124	-1.03157	0.000555209	-0.998004	-9.63566	4.75224	0.860652	2.69868	-186.73	6.29681e+06	0.500132	0.39009	78.0443	0.0252058	227.493
4.44462	-1.03162	0.00039779	-0.999297	-9.62971	3.20536	0.950912	3.50996	-186.731	3.96032e+06	0.4155	0.343427	79.3569	0.0449631	471.224
0.00192498	-1.0316	0.000394778	-0.997875	-9.65563	2.77477	1.03067	1.91339	-186.73	2.93579e+06	1.13028	0.33898	18.9657	0.0283846	397.865
2.57522e-06	-1.03149	0.000482989	-0.999648	-9.65487	4.87426	1.55443	4.44198	-186.729	6.62717e+06	0.852835	0.314691	76.8963	0.0458722	303.185
0.00338851	-1.0316	0.00039648	-0.992568	-9.65739	3.66983	0.934145	3.077	-186.714	3.38012e+06	0.959256	0.369425	73.4989	0.0361105	248.897
0.00728328	-1.03159	0.000942788	-6.19915e-05	-9.65398	3.09308	1.34217	2.24499	-186.728	2.93437e+06	0.484541	0.327576	79.0479	0.0173567	283.603
2.96459	-1.03163	0.000613271	-0.999231	-9.6468	2.74816	1.57129	2.83485	-186.731	4.61274e+06	0.472713	0.37729	84.5902	0.051834	482.323
0.000118885	-1.03151	0.0010442	-0.955614	-9.65635	3.55025	1.41667	4.03518	-186.729	5.87497e+06	0.494019	0.240171	19.9804	0.0317927	225.681
0.00623523	-1.03146	0.00049115	-0.990779	-9.6543	3.66137	1.20209	3.53949	-186.73	4.53815e+06	0.799798	0.346911	61.9388	0.0217372	493.834
1.07979	-1.0315	0.000816819	-0.990089	-9.62558	4.66893	0.676625	2.15379	-186.73	5.41274e+06	1.17326	0.311751	90.6933	0.0216567	325.221
0.0375374	-1.03136	0.000691839	-0.996576	-9.63497	2.47912	1.29203	2.18085	-186.723	2.13766e+06	0.46199	0.330643	74.7462	0.0519694	280.22
0.0030577	-1.03162	0.000792961	-0.988187	-9.65114	4.82034	1.45009	2.45151	-186.73	4.86829e+06	0.3188	0.568588	83.8783	0.0223709	428.588
1.30633	-1.0316	0.000566019	-0.995043	-9.65321	3.21702	1.54873	2.5875	-186.73	2.23354e+06	0.38517	0.437091	59.1468	0.00884679	321.763
0.00354428	-1.03162	0.000265395	-0.997548	-9.64864	2.86966	0.637814	2.28885	-186.73	6.40694e+06	0.398393	0.329589	79.7035	0.0294512	460.074
0.0013756	-1.03158	0.000717857	-1.74182e-06	-9.65326	3.57478	1.28669	1.94862	-186.729	6.08615e+06	0.82585	0.39348	17.4396	0.0429564	275.752
0.00207771	-1.03161	0.000652239	-0.999329	-9.65504	3.64023	0.917198	3.4908	-186.726	1.05429e+07	0.425374	0.342683	76.1646	0.0256665	325.474
0.00208444	-1.03161	0.000611495	-0.986671	-9.5951	3.54354	1.42285	2.83078	-186.725	3.31109e+06	0.387605	0.736622	75.7394	0.0155606	335.486
0.894443	-1.0316	0.000483476	-0.999923	-9.6239	2.98355	0.971445	1.94378	-186.713	9.33142e+06	0.393974	0.545981	23.8979	0.0250647	327.556
0.000333193	-1.0316	0.000448085	-0.997612	-9.653	2.9363	1.00408	2.62136	-186.731	8.67394e+06	0.424438	0.350974	27.2131	0.0230578	289.007
0.00513301	-1.0316	0.00084878	-1.64212e-07	-9.63242	2.83637	1.11589	3.49534	-186.729	5.14801e+06	0.416073	0.37053	134.607	0.0260486	339.717
1.5105	-1.03157	0.0004347	-0.997432	-9.6463	3.70116	1.25348	3.91086	-186.731	5.1465e+06	0.506985	0.367779	14.8365	0.0411708	166.456
2.68187	-1.03159	0.000938224	-0.995367	-9.64796	2.40755	1.41765	5.30477	-186.73	2.38571e+06	0.440649	0.453886	24.075	0.0201132	450.868
0.00499707	-1.03159	0.000608151	-0.99141	-9.65463	3.59723	1.06642	2.32048	-186.73	3.19103e+06	0.49089	0.234237	70.5329	0.0141579	391.067
0.000214812	-1.03163	0.000548361	-0.998209	-9.65546	2.17599	1.2858	2.0996	-186.729	3.90769e+06	0.944854	0.408848	43.8083	0.029582	272.747
0.00159408	-1.03157	0.000358721	-0.994342	-9.65696	3.0702	1.0367	2.29638	-186.724	6.31835e+06	0.474766	0.402583	84.5607	0.0222344	360.176
0.000667375	-1.03163	0.000530929	-0.99597	-9.62659	4.83677	1.51847	1.88354	-186.727	7.70588e+06	0.309354	0.414736	20.6962	0.0416679	308.369
0.0025062	-1.03162	0.000772291	-0.99922	-9.64286	3.49779	0.841371	3.25912	-186.731	9.54201e+06	0.449529	0.27238	24.2759	0.0329936	381.28
0.0025493	-1.0316	0.000684596	-0.998551	-9.63898	4.121	1.42896	2.76507	-186.73	4.52782e+06	0.804473	0.30423	74.9976	0.0204541	306.574
0.00228569	-1.03153	0.000454317	-0.996697	-9.64558	1.91886	1.46038	2.34869	-186.707	2.72521e+06	0.319647	0.356851	87.4492	0.013926	249.954
0.000633887	-1.03163	0.000448522	-0.993548	-9.65317	3.96402	1.18202	1.14977	-186.731	4.13934e+06	0.428398	0.411024	80.6866	0.0364562	348.898
0.968278	-1.03155	0.000496354	-0.999424	-9.63566	2.85866	1.18263	1.81809	-186.73	2.20434e+06	1.06533	0.32649	24.2402	0.0217897	314.962
1.29969	-1.0316	0.00051932	-1.62178e-05	-9.64	3.93421	1.33014	2.7614	-186.727	5.08875e+06	1.10386	0.411643	79.3011	0.0190295	294.798
0.00106452	-1.03132	0.00114575	-0.993062	-9.65412	4.01571	1.47999	2.05139	-186.73	7.17929e+06	0.841562	0.462998	10.8861	0.0403732	450.121
0.0177723	-1.03157	0.000915867	-0.995411	-9.59004	3.4215	1.09395	3.61958	-186.726	4.96037e+06	1.17295	0.537101	14.4373	0.0212087	451.558
0.00807821	-1.03126	0.000685456	-0.998173	-9.64842	3.46797	1.24648	1.92718	-186.731	5.03938e+06	0.793765	0.449391	75.125	0.0244179	419.437
0.000296294	-1.03162	0.000403516	-0.988293	-9.6536	4.31068	1.2949	1.82687	-186.73	4.54084e+06	0.500837	0.449001	80.7767	0.0182083	432.149
0.00363626	-1.03162	0.000505765	-1.34005e-06	-9.64449	3.33582	1.12937	1.55498	-186.728	3.45523e+06	0.504515	0.354227	77.5166	0.0461538	355.27
1.50784	-1.03162	0.000843319	-0.999914	-9.65234	3.65038	0.816891	3.49054	-186.73	5.08232e+06	0.44578	0.461443	74.2351	0.0400103	279.479
0.0048344	-1.03161	0.000295218	-0.938178	-9.64323	2.48641	1.79709	1.52881	-186.729	7.38923e+06	1.24871	0.292596	21.1235	0.0293122	342.904
0.00184248	-1.03162	0.000975165	-0.995185	-9.64354	4.38801	1.12847	2.70951	-186.728	6.90708e+06	0.408676	0.262755	141.876	0.0249135	280.899
9.54246	-1.03154	0.000859667	-0.989176	-9.61124	3.6133	1.34251	1.88634	-186.731	6.94015e+06	0.400992	0.337867	27.2529	0.0339612	237.451
0.767966	-1.03155	0.000789163	-0.999942	-9.64965	4.35006	1.29049	1.28373	-186.73	6.14862e+06	1.11974	0.408284	26.2472	0.0260139	218.615
1.30541	-1.03161	0.00106394	-0.994983	-9.62329	3.95687	1.02616	1.70379	-186.73	4.54169e+06	0.488703	0.320641	17.1105	0.026799	327.641
0.00311686	-1.03163	0.00056854	-0.993664	-9.62126	3.59395	1.34296	2.07082	-186.726	5.49327e+06	0.388663	0.284741	75.13	0.0223338	335.735
0.00323467	-1.03159	0.000441956	-0.993583	-9.63594	3.99241	1.29752	2.81195	-186.73	5.63817e+06	0.831306	0.338661	125.979	0.0102962	398.812
0.000554475	-1.03162	0.000828293	-0.999819	-9.64461	3.72519	0.804701	2.9362	-186.729	5.17451e+06	0.411584	0.439333	139.556	0.0277011	255.218
0.00288763	-1.0316	0.00053182	-0.999516	-9.60679	3.60263	1.17346	2.42411	-186.729	8.41097e+06	0.380555	0.344268	134.581	0.0384228	318.405
0.00197487	-1.03157	0.000955609	-0.999707	-9.65141	4.28171	1.17386	4.03476	-186.73	3.76397e+06	0.394921	0.336569	124.396	0.0322556	284.984
0.00258182	-1.03137	0.000462624	-0.999514	-9.6391	2.47605	0.615645	1.45535	-186.728	1.85258e+06	0.422635	0.340817	17.0217	0.0303574	261.116
