# Supplementary material for: Flood algorithm: a novel metaheuristic algorithm for optimization problems
Source: PeerJ Comput Sci. 2024 Oct 2;10:e2278. doi: 10.7717/peerj-cs.2278 (PMC11623059; doi:10.7717/peerj-cs.2278)
Supplement: Supplemental Information 10 [file peerj-cs-10-2278-s010.xlsx]

## Sheet: FA-GA
SN	Benchmark Function	FA_ranksum	GA_ranksum	p-value	z-value	logical
1	Ackley	14370	5730	4.8567e-26	-10.5542	1
2	Beale	11832	8268	1.3435e-05	-4.3529	1
3	Easom	10705	9395	0.1098	-1.5992	0
4	Michalewicz	15050	5050	2.5621e-34	-12.2157	1
5	Quatric	14771	5329	8.8897e-31	-11.534	1
6	Rastrigin	14621	5479	5.8807e-29	-11.1675	1
7	Shubert	15045	5055	2.9772e-34	-12.2035	1
8	Six hump camel back	15050	5050	2.5621e-34	-12.2157	1
9	Sphere	15048	5052	2.7208e-34	-12.2108	1
10	Bent Cigar	14758	5342	1.2852e-30	-11.5023	1
11	HGBat	14609	5491	8.1766e-29	-11.1382	1
12	Griewank	13985	6115	7.0115e-22	-9.6135	1
13	Rosenbrock	10656	9444	0.139	-1.4795	0
14	Levy	15050	5050	2.5621e-34	-12.2157	1
15	Zakharov	5050	15050	2.5621e-34	12.2157	1

## Sheet: FA-PSO
SN	Benchmark Function	FA_ranksum	PSO_ranksum	p-value	z-value	logical
1	Ackley	15050	5050	2.5621e-34	-12.2157	1
2	Beale	5118	14982	1.9495e-33	12.0496	1
3	Easom	5050	15050	2.5621e-34	12.2157	1
4	Michalewicz	15050	5050	2.5621e-34	-12.2157	1
5	Quatric	15050	5050	2.5621e-34	-12.2157	1
6	Rastrigin	15050	5050	2.5621e-34	-12.2157	1
7	Shubert	5150	14950	5.0185e-33	11.9714	1
8	Six hump camel back	5050	15050	2.562e-34	12.2157	1
9	Sphere	15050	5050	2.5621e-34	-12.2157	1
10	Bent Cigar	15050	5050	2.5621e-34	-12.2157	1
11	HGBat	15050	5050	2.5621e-34	-12.2157	1
12	Griewank	15050	5050	2.5621e-34	-12.2157	1
13	Rosenbrock	14743	5357	1.9639e-30	-11.4656	1
14	Levy	15050	5050	2.5621e-34	-12.2157	1
15	Zakharov	13394	6706	3.0975e-16	-8.1695	1

## Sheet: FA-SA
SN	Benchmark Function	FA_ranksum	SA_ranksum	p-value	z-value	logical
1	Ackley	13972	6128	9.5415e-22	-9.5817	1
2	Beale	12693	7407	1.0704e-10	-6.4567	1
3	Easom	9571	10529	0.2423	1.1692	0
4	Michalewicz	10259	9841	0.6104	-0.5094	0
5	Quatric	15050	5050	2.5621e-34	-12.2157	1
6	Rastrigin	14095	6005	4.9686e-23	-9.8823	1
7	Shubert	11162	8938	0.0066	-2.7158	1
8	Six hump camel back	12607	7493	4.1969e-10	-6.2465	1
9	Sphere	15050	5050	2.5621e-34	-12.2157	1
10	Bent Cigar	10475	9625	0.2996	-1.0372	0
11	HGBat	10056	10044	0.9893	-0.0134	0
12	Griewank	14241	5859	1.3257e-24	-10.239	1
13	Rosenbrock	10338	9762	0.4824	-0.7025	0
14	Levy	5250	14850	9.2637e-32	11.727	1
15	Zakharov	10298	9802	0.5454	-0.6047	0
