# Supplementary material for: Flood algorithm: a novel metaheuristic algorithm for optimization problems
Source: PeerJ Comput Sci. 2024 Oct 2;10:e2278. doi: 10.7717/peerj-cs.2278 (PMC11623059; doi:10.7717/peerj-cs.2278)
Supplement: Supplemental Information 15 [file peerj-cs-10-2278-s015.xlsx]

## Sheet: FA
Exam Sessions
1	2	3	4	5	6	7	8	9	10	11
6	3	7	6	9	1	8	42	60	7	2
3	2	3	4	11	0	8	52	63	9	2
2	8	2	2	11	0	10	56	66	12	4
4	1	4	4	9	0	4	56	56	12	2
3	3	3	5	6	0	8	49	67	11	3
4	1	1	2	17	0	2	52	69	4	5
1	4	2	6	8	0	5	46	69	6	1
5	5	3	4	10	0	5	51	59	9	3
3	3	3	3	14	0	10	55	58	8	2
4	2	3	6	12	0	5	50	57	5	2
3	2	1	4	11	0	5	51	58	9	2
4	4	4	1	8	0	4	46	66	13	2
4	2	5	2	12	0	7	60	52	6	2
1	3	4	4	17	0	6	51	56	7	2
6	3	4	4	7	0	1	49	52	7	3
2	8	2	4	7	0	7	39	67	4	4
5	5	1	5	9	0	6	47	57	7	3
5	2	3	3	13	0	7	47	62	4	1
5	0	4	3	8	1	7	47	58	7	3
5	5	3	2	8	0	8	53	62	11	2
5	0	2	5	10	0	1	50	58	4	0
2	3	7	2	7	0	0	46	62	1	2
4	4	3	3	11	0	4	53	67	5	2
5	2	6	7	11	0	7	53	56	7	1
2	5	4	2	10	0	5	45	53	8	3
4	0	5	1	8	0	5	56	52	9	1
1	2	3	5	11	0	6	53	61	8	3
1	3	4	6	11	0	4	49	72	4	0
3	5	4	5	12	0	6	51	51	5	3
3	4	4	5	10	1	11	46	65	6	2
3	3	2	6	7	0	5	50	58	5	0
2	5	6	4	12	0	6	51	58	7	3
5	2	3	7	7	0	6	44	59	5	1
2	2	5	2	10	0	7	53	57	3	2
4	3	5	4	4	0	9	56	65	10	4
3	6	6	4	12	0	6	46	71	3	5
4	6	3	5	15	0	6	46	77	9	2
6	3	4	6	13	0	7	53	58	7	1
4	5	3	2	7	2	4	50	51	6	1
6	1	2	5	8	0	6	53	55	9	2
3	1	5	6	13	0	7	51	67	11	0
1	1	1	5	8	0	5	47	61	3	1
1	4	4	2	8	0	1	48	65	10	2
2	2	3	6	7	0	8	50	65	9	2
2	9	7	3	8	0	5	42	59	9	3
2	0	4	3	8	1	8	56	59	8	1
4	1	1	6	11	0	6	54	76	5	1
3	4	1	4	13	0	11	56	59	5	0
4	3	2	2	7	0	10	55	53	8	5
5	2	3	2	8	0	6	53	65	7	0

## Sheet: GA
Exam Sessions
1	2	3	4	5	6	7	8	9	10	11
18	25	28	38	15	9	51	58	98	57	19
17	34	37	46	26	11	70	96	104	40	14
17	35	27	38	28	4	36	99	107	45	18
17	20	27	47	27	7	56	85	97	27	13
27	28	30	25	36	4	53	88	87	35	9
23	37	39	30	31	15	36	97	101	54	9
25	23	31	32	30	8	49	86	116	55	9
24	34	37	42	26	8	67	60	84	55	17
26	34	18	46	35	4	66	109	108	42	12
24	23	19	25	24	16	67	79	84	50	11
12	16	31	44	24	15	71	85	95	34	16
11	35	27	41	24	4	36	77	89	36	12
15	27	17	46	27	12	60	101	80	30	19
24	31	18	25	17	5	38	89	103	43	6
25	38	38	39	20	12	49	81	98	45	17
14	30	22	32	15	17	72	80	133	62	12
23	26	33	25	24	16	61	82	129	51	6
21	32	39	36	31	11	66	92	138	39	8
13	17	24	36	32	13	61	79	124	63	13
16	28	25	43	11	13	68	60	96	48	16
23	26	28	42	35	4	63	62	91	27	17
11	35	24	27	22	8	45	108	97	27	17
17	35	28	45	31	4	37	81	103	39	14
15	20	18	27	14	14	44	103	96	61	12
22	18	27	32	27	7	42	95	123	49	9
26	30	28	28	11	14	46	94	130	47	17
21	20	18	41	33	9	57	76	86	39	12
13	34	29	47	12	16	50	71	84	46	16
17	27	21	34	35	13	63	54	114	44	12
19	22	27	44	28	6	65	70	132	39	18
25	24	17	44	16	7	53	86	85	29	12
14	33	20	36	36	12	45	105	102	58	11
24	31	20	44	17	14	49	89	124	32	11
23	32	29	46	30	15	45	91	83	60	8
26	37	17	28	14	16	49	77	131	43	7
13	24	29	29	34	4	49	81	129	28	18
21	38	36	42	23	3	51	54	103	57	12
18	29	32	29	13	17	57	68	125	41	19
18	22	39	33	28	13	61	81	131	52	11
11	38	28	38	31	17	45	102	86	61	9
19	33	22	27	15	3	48	84	79	48	7
24	26	24	26	23	10	64	69	87	27	18
26	23	32	30	13	7	53	55	87	63	16
15	21	29	47	25	9	52	101	101	37	19
20	20	28	33	36	17	39	91	81	52	11
19	17	24	46	28	12	69	79	127	52	16
17	30	20	42	36	6	52	85	131	60	15
23	35	31	43	28	12	43	107	112	60	7
16	36	38	28	28	7	37	61	106	62	11
19	17	35	26	20	13	64	100	82	62	9

## Sheet: PSO
Exam Sessions
1	2	3	4	5	6	7	8	9	10	11
87	64	55	81	90	58	76	122	99	87	102
57	74	78	75	83	67	70	111	106	81	85
48	60	75	77	75	63	87	110	147	70	95
51	79	79	68	81	72	79	101	105	65	97
67	54	72	85	80	51	67	136	88	77	78
58	87	54	73	86	79	64	148	158	61	92
67	59	84	64	86	79	79	101	130	69	104
49	82	65	74	89	53	80	92	120	66	76
83	80	76	81	83	76	63	112	88	84	70
64	53	79	74	82	72	92	102	121	73	106
63	90	63	86	78	54	99	143	115	85	87
80	92	84	78	67	62	88	91	137	88	95
64	63	72	66	64	67	92	139	153	69	98
65	82	66	84	93	76	66	127	95	99	71
65	58	50	75	92	81	100	102	154	83	96
52	71	70	70	73	63	76	114	84	60	73
67	87	69	94	84	63	84	106	94	73	69
65	87	47	61	82	61	94	133	137	90	93
48	90	61	88	84	52	93	133	107	61	87
70	92	58	77	80	49	78	92	129	74	71
79	81	61	61	87	57	76	132	141	65	104
58	70	67	94	102	79	82	97	135	97	86
87	86	53	93	101	69	90	92	96	72	72
56	63	52	86	102	74	77	97	116	86	89
53	73	67	85	75	54	77	116	160	93	102
63	54	74	67	92	75	93	115	108	70	70
73	83	67	90	68	79	82	103	102	83	86
58	72	81	82	81	47	90	94	114	86	96
66	86	55	80	81	49	68	88	113	66	95
59	74	75	75	91	51	93	103	128	96	72
66	59	82	88	94	56	90	105	129	78	77
82	67	83	65	101	58	92	114	160	89	106
83	81	65	55	68	82	83	113	135	91	104
82	67	58	72	93	55	90	107	143	98	69
81	84	83	74	75	54	99	87	152	61	81
72	58	80	61	94	48	98	142	145	92	84
86	71	77	87	97	50	81	143	133	79	76
69	62	52	88	79	82	94	134	125	99	100
75	89	63	57	95	46	97	122	87	91	95
64	89	46	93	85	56	101	97	125	99	95
59	70	49	59	97	57	73	139	110	63	78
56	73	84	55	89	73	83	106	138	66	70
81	58	62	76	84	48	86	97	94	64	78
59	86	57	92	77	71	89	96	108	75	78
76	53	76	88	76	57	72	122	123	65	79
51	89	69	58	94	52	78	140	129	98	86
73	73	63	93	70	68	79	97	147	95	103
57	89	58	67	89	81	69	123	106	77	96
81	72	61	79	69	49	66	120	92	73	98
86	73	84	87	92	64	93	97	158	70	97

## Sheet: SA
Exam Sessions
1	2	3	4	5	6	7	8	9	10	11
4	2	9	5	16	1	12	44	77	7	3
3	8	10	7	11	0	9	49	69	6	2
7	3	9	11	9	0	8	48	65	17	1
8	5	5	8	16	0	8	52	69	6	3
5	6	10	12	17	1	9	54	68	8	5
5	6	8	5	13	1	12	45	73	11	4
5	6	6	5	8	0	9	60	72	18	3
5	5	6	9	14	1	9	55	61	12	3
7	10	8	4	12	1	10	54	65	9	2
9	3	11	7	12	0	15	47	70	16	1
4	3	5	4	11	0	7	57	67	7	9
8	6	4	6	17	0	13	45	64	13	3
5	6	3	9	15	0	5	53	75	12	1
4	9	6	8	10	1	8	53	71	8	5
5	5	8	2	13	0	13	46	73	10	1
9	7	3	4	16	0	7	53	79	8	3
6	7	8	10	12	1	8	50	58	10	7
3	6	3	4	16	0	7	43	74	9	3
4	8	8	7	11	0	8	47	70	13	4
5	8	8	9	11	0	10	46	68	8	3
7	1	7	7	12	0	13	54	62	14	7
4	4	6	4	13	0	4	45	66	15	1
1	6	10	9	11	0	7	53	63	13	1
4	7	5	11	11	1	12	52	73	7	4
9	11	7	8	14	1	7	55	80	10	1
7	3	5	8	12	0	8	48	73	15	5
3	6	7	5	12	0	7	54	71	9	3
8	4	8	7	17	0	9	57	67	7	2
6	5	10	11	15	0	9	53	69	10	3
4	6	5	9	9	0	11	50	69	10	8
5	6	6	6	15	0	10	49	77	12	8
3	6	4	8	14	0	11	49	72	11	7
5	7	4	5	12	1	4	49	58	11	5
7	5	9	9	19	0	6	46	63	12	5
10	5	2	7	15	0	9	52	64	14	2
4	3	5	6	13	0	8	41	82	11	2
7	3	7	6	6	0	10	53	60	4	4
7	6	9	8	11	1	5	56	67	9	4
4	2	10	5	21	0	9	59	67	12	5
4	6	9	3	11	1	11	48	70	7	3
5	6	4	4	15	0	8	58	58	3	2
6	6	8	4	16	0	11	47	73	8	3
2	2	8	5	15	1	10	46	54	14	6
5	8	9	6	11	2	9	48	63	3	8
4	6	5	7	8	0	9	47	75	8	5
4	6	10	7	15	1	7	49	59	7	5
9	8	7	4	14	0	7	47	73	11	4
7	9	9	4	16	0	11	46	82	14	3
2	8	6	7	15	0	6	51	73	9	8
3	6	7	6	14	0	6	47	68	6	6
