# Supplementary material for: Flood algorithm: a novel metaheuristic algorithm for optimization problems
Source: PeerJ Comput Sci. 2024 Oct 2;10:e2278. doi: 10.7717/peerj-cs.2278 (PMC11623059; doi:10.7717/peerj-cs.2278)
Supplement: Supplemental Information 16 [file peerj-cs-10-2278-s016.xlsx]

## Sheet: Sayfa1
Classroom	Row	Column	Side	Back	Name
1	1	1	2	6	D-301
1	1	2	-1	7	D-301
1	1	3	-1	8	D-301
1	1	4	5	9	D-301
1	1	5	-1	10	D-301
1	2	1	7	11	D-301
1	2	2	-1	12	D-301
1	2	3	-1	13	D-301
1	2	4	10	14	D-301
1	2	5	-1	15	D-301
1	3	1	12	16	D-301
1	3	2	-1	17	D-301
1	3	3	-1	18	D-301
1	3	4	15	19	D-301
1	3	5	-1	20	D-301
1	4	1	17	21	D-301
1	4	2	-1	22	D-301
1	4	3	-1	23	D-301
1	4	4	20	24	D-301
1	4	5	-1	25	D-301
1	5	1	22	26	D-301
1	5	2	-1	27	D-301
1	5	3	-1	28	D-301
1	5	4	25	29	D-301
1	5	5	-1	30	D-301
1	6	1	27	-1	D-301
1	6	2	-1	-1	D-301
2	1	1	29	33	D-302
2	1	2	-1	34	D-302
2	1	3	-1	35	D-302
2	1	4	32	36	D-302
2	1	5	-1	37	D-302
2	1	6	34	38	D-302
2	2	1	-1	39	D-302
2	2	2	-1	40	D-302
2	2	3	37	41	D-302
2	2	4	-1	42	D-302
2	2	5	39	43	D-302
2	2	6	-1	44	D-302
2	3	1	-1	45	D-302
2	3	2	42	46	D-302
2	3	3	-1	47	D-302
2	3	4	44	48	D-302
2	3	5	-1	49	D-302
2	3	6	-1	50	D-302
2	4	1	47	51	D-302
2	4	2	-1	52	D-302
2	4	3	49	53	D-302
2	4	4	-1	54	D-302
2	4	5	-1	55	D-302
2	4	6	52	56	D-302
2	6	1	-1	57	D-302
2	6	2	54	-1	D-302
2	6	3	-1	-1	D-302
2	6	4	-1	-1	D-302
2	6	5	57	-1	D-302
2	6	6	-1	-1	D-302
3	1	1	59	63	D-303
3	1	2	-1	64	D-303
3	1	3	-1	65	D-303
3	1	4	62	66	D-303
3	1	5	-1	67	D-303
3	2	1	64	68	D-303
3	2	2	-1	69	D-303
3	2	3	-1	70	D-303
3	2	4	67	71	D-303
3	2	5	-1	72	D-303
3	3	1	69	73	D-303
3	3	2	-1	74	D-303
3	3	3	-1	75	D-303
3	3	4	72	76	D-303
3	3	5	-1	77	D-303
3	4	1	74	78	D-303
3	4	2	-1	79	D-303
3	4	3	-1	-1	D-303
3	4	4	77	80	D-303
3	4	5	-1	81	D-303
3	5	1	79	82	D-303
3	5	2	-1	83	D-303
3	5	4	81	-1	D-303
3	5	5	-1	-1	D-303
3	6	1	83	-1	D-303
3	6	2	-1	-1	D-303
4	1	1	85	89	D-304
4	1	2	-1	90	D-304
4	1	3	-1	91	D-304
4	1	4	88	92	D-304
4	1	5	-1	93	D-304
4	2	1	90	94	D-304
4	2	2	-1	95	D-304
4	2	3	-1	96	D-304
4	2	4	93	97	D-304
4	2	5	-1	98	D-304
4	3	1	95	99	D-304
4	3	2	-1	100	D-304
4	3	3	-1	101	D-304
4	3	4	98	102	D-304
4	3	5	-1	103	D-304
4	4	1	100	104	D-304
4	4	2	-1	-1	D-304
4	4	3	-1	105	D-304
4	4	4	103	106	D-304
4	4	5	-1	107	D-304
4	5	1	-1	108	D-304
4	5	3	-1	109	D-304
4	5	4	107	-1	D-304
4	5	5	-1	-1	D-304
4	6	1	-1	-1	D-304
4	6	3	-1	-1	D-304
5	1	1	111	115	D-305
5	1	2	-1	116	D-305
5	1	3	-1	117	D-305
5	1	4	114	118	D-305
5	1	5	-1	119	D-305
5	2	1	116	120	D-305
5	2	2	-1	121	D-305
5	2	3	-1	122	D-305
5	2	4	119	123	D-305
5	2	5	-1	124	D-305
5	3	1	121	125	D-305
5	3	2	-1	126	D-305
5	3	3	-1	127	D-305
5	3	4	124	128	D-305
5	3	5	-1	129	D-305
5	4	1	126	130	D-305
5	4	2	-1	131	D-305
5	4	3	-1	132	D-305
5	4	4	129	133	D-305
5	4	5	-1	134	D-305
5	5	1	131	135	D-305
5	5	2	-1	136	D-305
5	5	3	-1	-1	D-305
5	5	4	134	-1	D-305
5	5	5	-1	-1	D-305
5	6	1	136	-1	D-305
5	6	2	-1	-1	D-305
6	1	3	-1	140	D-306
6	2	1	139	143	D-306
6	2	2	-1	144	D-306
6	2	3	-1	145	D-306
6	2	4	142	146	D-306
6	2	5	-1	147	D-306
6	3	1	144	148	D-306
6	3	2	-1	149	D-306
6	3	3	-1	150	D-306
6	3	4	147	151	D-306
6	3	5	-1	152	D-306
6	4	1	149	153	D-306
6	4	2	-1	154	D-306
6	4	3	-1	155	D-306
6	4	4	152	156	D-306
6	4	5	-1	157	D-306
6	5	1	154	158	D-306
6	5	2	-1	159	D-306
6	5	3	-1	160	D-306
6	5	4	157	161	D-306
6	5	5	-1	162	D-306
6	6	1	159	-1	D-306
6	6	2	-1	-1	D-306
6	6	3	-1	-1	D-306
6	6	4	162	-1	D-306
6	6	5	-1	-1	D-306
7	1	1	164	168	D-307
7	1	2	-1	169	D-307
7	1	3	-1	170	D-307
7	1	4	167	171	D-307
7	1	5	-1	172	D-307
7	2	1	169	173	D-307
7	2	2	-1	174	D-307
7	2	3	-1	175	D-307
7	2	4	172	176	D-307
7	2	5	-1	177	D-307
7	3	1	174	178	D-307
7	3	2	-1	179	D-307
7	3	3	-1	180	D-307
7	3	4	177	181	D-307
7	3	5	-1	182	D-307
7	4	1	179	183	D-307
7	4	2	-1	184	D-307
7	4	3	-1	185	D-307
7	4	4	182	186	D-307
7	4	5	-1	187	D-307
7	5	1	184	188	D-307
7	5	2	-1	-1	D-307
7	5	3	-1	-1	D-307
7	5	4	187	-1	D-307
7	5	5	-1	-1	D-307
7	6	1	-1	-1	D-307
8	1	3	-1	192	D-308
8	2	1	191	195	D-308
8	2	2	-1	196	D-308
8	2	3	-1	197	D-308
8	2	4	194	198	D-308
8	2	5	-1	199	D-308
8	3	1	196	200	D-308
8	3	2	-1	201	D-308
8	3	3	-1	202	D-308
8	3	4	199	203	D-308
8	3	5	-1	204	D-308
8	4	1	201	205	D-308
8	4	2	-1	206	D-308
8	4	3	-1	207	D-308
8	4	4	204	208	D-308
8	4	5	-1	209	D-308
8	5	1	206	210	D-308
8	5	2	-1	211	D-308
8	5	3	-1	212	D-308
8	5	4	209	213	D-308
8	5	5	-1	214	D-308
8	6	1	211	-1	D-308
8	6	2	-1	-1	D-308
8	6	3	-1	-1	D-308
8	6	4	214	-1	D-308
8	6	5	-1	-1	D-308
9	1	3	-1	218	D-309
9	2	1	217	221	D-309
9	2	2	-1	222	D-309
9	2	3	-1	223	D-309
9	2	4	220	224	D-309
9	2	5	-1	225	D-309
9	3	1	222	226	D-309
9	3	2	-1	227	D-309
9	3	3	-1	228	D-309
9	3	4	225	229	D-309
9	3	5	-1	230	D-309
9	4	1	227	231	D-309
9	4	2	-1	232	D-309
9	4	3	-1	233	D-309
9	4	4	230	234	D-309
9	4	5	-1	235	D-309
9	5	1	232	236	D-309
9	5	2	-1	237	D-309
9	5	3	-1	238	D-309
9	5	4	235	239	D-309
9	5	5	-1	240	D-309
9	6	1	237	-1	D-309
9	6	2	-1	-1	D-309
9	6	3	-1	-1	D-309
9	6	4	240	-1	D-309
9	6	5	-1	-1	D-309
10	1	1	242	247	D-310
10	1	2	-1	248	D-310
10	1	3	244	249	D-310
10	1	4	-1	250	D-310
10	1	5	246	251	D-310
10	1	6	-1	252	D-310
10	2	1	248	253	D-310
10	2	2	-1	254	D-310
10	2	3	250	255	D-310
10	2	4	-1	256	D-310
10	2	5	252	257	D-310
10	2	6	-1	258	D-310
10	3	1	254	259	D-310
10	3	2	-1	260	D-310
10	3	3	256	261	D-310
10	3	4	-1	262	D-310
10	3	5	258	263	D-310
10	3	6	-1	264	D-310
10	4	1	260	265	D-310
10	4	2	-1	266	D-310
10	4	3	262	267	D-310
10	4	4	-1	268	D-310
10	4	5	264	269	D-310
10	4	6	-1	270	D-310
10	5	1	266	271	D-310
10	5	2	-1	272	D-310
10	5	3	268	-1	D-310
10	5	4	-1	-1	D-310
10	5	5	270	-1	D-310
10	5	6	-1	-1	D-310
10	6	1	272	-1	D-310
10	6	2	-1	-1	D-310
11	1	1	274	279	D-311
11	1	2	-1	280	D-311
11	1	3	276	281	D-311
11	1	4	-1	282	D-311
11	1	5	278	283	D-311
11	1	6	-1	284	D-311
11	2	1	280	285	D-311
11	2	2	-1	286	D-311
11	2	3	282	287	D-311
11	2	4	-1	288	D-311
11	2	5	284	289	D-311
11	2	6	-1	290	D-311
11	3	1	286	291	D-311
11	3	2	-1	292	D-311
11	3	3	288	293	D-311
11	3	4	-1	294	D-311
11	3	5	290	295	D-311
11	3	6	-1	296	D-311
11	4	1	292	297	D-311
11	4	2	-1	298	D-311
11	4	3	294	299	D-311
11	4	4	-1	300	D-311
11	4	5	296	301	D-311
11	4	6	-1	302	D-311
11	5	1	298	303	D-311
11	5	2	-1	304	D-311
11	5	3	300	-1	D-311
11	5	4	-1	-1	D-311
11	5	5	302	-1	D-311
11	5	6	-1	-1	D-311
11	6	1	304	-1	D-311
11	6	2	-1	-1	D-311
12	1	1	306	311	D-314
12	1	2	-1	312	D-314
12	1	3	308	313	D-314
12	1	4	-1	314	D-314
12	1	5	310	315	D-314
12	1	6	-1	316	D-314
12	2	1	312	317	D-314
12	2	2	-1	318	D-314
12	2	3	314	319	D-314
12	2	4	-1	320	D-314
12	2	5	316	321	D-314
12	2	6	-1	322	D-314
12	3	1	318	323	D-314
12	3	2	-1	324	D-314
12	3	3	320	325	D-314
12	3	4	-1	326	D-314
12	3	5	322	327	D-314
12	3	6	-1	328	D-314
12	4	1	324	329	D-314
12	4	2	-1	330	D-314
12	4	3	326	-1	D-314
12	4	4	-1	-1	D-314
12	4	5	328	-1	D-314
12	4	6	-1	-1	D-314
12	5	1	330	-1	D-314
12	5	2	-1	-1	D-314
13	1	1	332	336	D-316
13	1	2	-1	337	D-316
13	1	3	-1	338	D-316
13	1	4	335	339	D-316
13	1	5	-1	340	D-316
13	2	1	337	341	D-316
13	2	2	-1	342	D-316
13	2	3	-1	343	D-316
13	2	4	340	344	D-316
13	2	5	-1	345	D-316
13	3	1	342	346	D-316
13	3	2	-1	347	D-316
13	3	3	-1	348	D-316
13	3	4	345	349	D-316
13	3	5	-1	350	D-316
13	4	1	347	351	D-316
13	4	2	-1	352	D-316
13	4	3	-1	353	D-316
13	4	4	350	354	D-316
13	4	5	-1	355	D-316
13	5	1	352	356	D-316
13	5	2	-1	357	D-316
13	5	3	-1	-1	D-316
13	5	4	355	-1	D-316
13	5	5	-1	-1	D-316
13	6	1	357	-1	D-316
13	6	2	-1	-1	D-316
14	1	1	359	363	D-317
14	1	2	-1	364	D-317
14	1	3	-1	365	D-317
14	1	4	362	366	D-317
14	1	5	-1	367	D-317
14	2	1	364	368	D-317
14	2	2	-1	369	D-317
14	2	3	-1	370	D-317
14	2	4	367	371	D-317
14	2	5	-1	372	D-317
14	3	1	369	373	D-317
14	3	2	-1	374	D-317
14	3	3	-1	375	D-317
14	3	4	372	376	D-317
14	3	5	-1	377	D-317
14	4	1	374	378	D-317
14	4	2	-1	379	D-317
14	4	3	-1	380	D-317
14	4	4	377	381	D-317
14	4	5	-1	382	D-317
14	5	1	379	383	D-317
14	5	2	-1	384	D-317
14	5	3	-1	-1	D-317
14	5	4	382	-1	D-317
14	5	5	-1	-1	D-317
14	6	1	384	-1	D-317
14	6	2	-1	-1	D-317
15	1	1	386	388	D-201
15	1	2	-1	389	D-201
15	1	3	-1	390	D-201
15	2	1	389	393	D-201
15	2	2	-1	394	D-201
15	2	3	-1	395	D-201
15	2	4	392	396	D-201
15	2	5	-1	397	D-201
15	3	1	394	398	D-201
15	3	2	-1	399	D-201
15	3	3	-1	400	D-201
15	3	4	397	401	D-201
15	3	5	-1	402	D-201
15	4	1	399	403	D-201
15	4	2	-1	404	D-201
15	4	3	-1	405	D-201
15	4	4	402	406	D-201
15	4	5	-1	407	D-201
15	5	1	404	408	D-201
15	5	2	-1	409	D-201
15	5	3	-1	410	D-201
15	5	4	407	411	D-201
15	5	5	-1	412	D-201
15	6	1	409	-1	D-201
15	6	2	-1	-1	D-201
15	6	3	-1	-1	D-201
15	6	4	412	-1	D-201
15	6	5	-1	-1	D-201
16	1	1	414	418	D-202
16	1	2	-1	419	D-202
16	1	3	-1	420	D-202
16	1	4	417	421	D-202
16	1	5	-1	422	D-202
16	2	1	419	423	D-202
16	2	2	-1	424	D-202
16	2	3	-1	425	D-202
16	2	4	422	426	D-202
16	2	5	-1	427	D-202
16	3	1	424	428	D-202
16	3	2	-1	429	D-202
16	3	3	-1	430	D-202
16	3	4	427	431	D-202
16	3	5	-1	432	D-202
16	4	1	429	433	D-202
16	4	2	-1	434	D-202
16	4	3	-1	435	D-202
16	4	4	432	436	D-202
16	4	5	-1	437	D-202
16	5	1	434	438	D-202
16	5	2	-1	-1	D-202
16	5	3	-1	-1	D-202
16	5	4	437	439	D-202
16	5	5	-1	440	D-202
16	6	1	-1	-1	D-202
16	6	4	440	-1	D-202
16	6	5	-1	-1	D-202
17	1	1	-1	446	D-203
17	2	1	443	447	D-203
17	2	2	-1	448	D-203
17	2	3	-1	449	D-203
17	2	4	446	450	D-203
17	2	5	-1	451	D-203
17	3	1	448	452	D-203
17	3	2	-1	453	D-203
17	3	3	-1	454	D-203
17	3	4	451	455	D-203
17	3	5	-1	456	D-203
17	4	1	453	457	D-203
17	4	2	-1	458	D-203
17	4	3	-1	459	D-203
17	4	4	456	460	D-203
17	4	5	-1	461	D-203
17	5	1	458	462	D-203
17	5	2	-1	463	D-203
17	5	3	-1	464	D-203
17	5	4	461	465	D-203
17	5	5	-1	466	D-203
17	6	1	463	-1	D-203
17	6	2	-1	-1	D-203
17	6	3	-1	-1	D-203
17	6	4	466	-1	D-203
17	6	5	-1	-1	D-203
18	1	1	468	472	D-204
18	1	2	-1	473	D-204
18	1	3	470	474	D-204
18	1	4	-1	475	D-204
18	1	5	-1	476	D-204
18	2	1	473	477	D-204
18	2	2	-1	478	D-204
18	2	3	475	479	D-204
18	2	4	-1	480	D-204
18	2	5	-1	481	D-204
18	3	1	478	482	D-204
18	3	2	-1	483	D-204
18	3	3	480	484	D-204
18	3	4	-1	485	D-204
18	3	5	-1	486	D-204
18	4	1	483	487	D-204
18	4	2	-1	488	D-204
18	4	3	485	-1	D-204
18	4	4	-1	489	D-204
18	4	5	-1	490	D-204
18	5	1	488	491	D-204
18	5	2	-1	492	D-204
18	5	4	490	-1	D-204
18	5	5	-1	-1	D-204
18	6	1	492	-1	D-204
18	6	2	-1	-1	D-204
19	1	1	-1	494	D-205
19	2	1	495	499	D-205
19	2	2	-1	500	D-205
19	2	3	-1	501	D-205
19	2	4	498	502	D-205
19	2	5	-1	503	D-205
19	3	1	500	504	D-205
19	3	2	-1	505	D-205
19	3	3	-1	506	D-205
19	3	4	503	507	D-205
19	3	5	-1	508	D-205
19	4	1	505	509	D-205
19	4	2	-1	510	D-205
19	4	3	-1	511	D-205
19	4	4	508	512	D-205
19	4	5	-1	513	D-205
19	5	1	510	514	D-205
19	5	2	-1	515	D-205
19	5	3	-1	516	D-206
19	5	4	513	517	D-205
19	5	5	-1	518	D-205
19	6	1	515	-1	D-205
19	6	2	-1	-1	D-205
19	6	3	-1	-1	D-205
19	6	4	518	-1	D-205
19	6	5	-1	-1	D-205
20	1	1	520	524	D-206
20	1	2	-1	525	D-206
20	1	3	522	526	D-206
20	1	4	-1	527	D-206
20	1	5	-1	528	D-206
20	2	1	525	529	D-206
20	2	2	-1	530	D-206
20	2	3	527	531	D-206
20	2	4	-1	532	D-206
20	2	5	-1	533	D-206
20	3	1	530	534	D-206
20	3	2	-1	535	D-206
20	3	3	532	536	D-206
20	3	4	-1	537	D-206
20	3	5	-1	538	D-206
20	4	1	535	539	D-206
20	4	2	-1	540	D-206
20	4	3	537	-1	D-206
20	4	4	-1	541	D-206
20	4	5	-1	542	D-206
20	5	1	540	543	D-206
20	5	2	-1	544	D-206
20	5	4	542	-1	D-206
20	5	5	-1	-1	D-206
20	6	1	544	-1	D-206
20	6	2	-1	-1	D-206
21	1	1	-1	546	D-207
21	2	1	547	551	D-207
21	2	2	-1	552	D-207
21	2	3	-1	553	D-207
21	2	4	550	554	D-207
21	2	5	-1	555	D-207
21	3	1	552	556	D-207
21	3	2	-1	557	D-207
21	3	3	-1	558	D-207
21	3	4	555	559	D-207
21	3	5	-1	560	D-207
21	4	1	557	561	D-207
21	4	2	-1	562	D-207
21	4	3	-1	563	D-207
21	4	4	560	564	D-207
21	4	5	-1	565	D-207
21	5	1	562	566	D-207
21	5	2	-1	567	D-207
21	5	3	-1	568	D-207
21	5	4	565	569	D-207
21	5	5	-1	570	D-207
21	6	1	567	-1	D-207
21	6	2	-1	-1	D-207
21	6	3	-1	-1	D-207
21	6	4	570	-1	D-207
21	6	5	-1	-1	D-207
22	1	1	-1	574	D-208
22	1	2	573	575	D-208
22	1	3	-1	576	D-208
22	2	1	575	577	D-208
22	2	2	-1	578	D-208
22	2	3	577	579	D-208
22	3	1	-1	580	D-208
22	3	2	579	-1	D-208
22	3	3	-1	-1	D-208
22	4	1	-1	-1	D-208
23	1	1	-1	584	D-209
23	1	2	583	585	D-209
23	1	3	-1	586	D-209
23	2	1	585	587	D-209
23	2	2	-1	588	D-209
23	2	3	587	589	D-209
23	3	1	-1	-1	D-209
23	3	2	589	-1	D-209
23	3	3	-1	590	D-209
23	4	1	-1	-1	D-209
24	1	1	592	597	D-210
24	1	2	-1	598	D-210
24	1	3	594	599	D-210
24	1	4	-1	600	D-210
24	1	5	596	601	D-210
24	1	6	-1	602	D-210
24	2	1	598	603	D-210
24	2	2	-1	604	D-210
24	2	3	600	605	D-210
24	2	4	-1	606	D-210
24	2	5	602	607	D-210
24	2	6	-1	608	D-210
24	3	1	604	609	D-210
24	3	2	-1	610	D-210
24	3	3	606	611	D-210
24	3	4	-1	612	D-210
24	3	5	608	613	D-210
24	3	6	-1	614	D-210
24	4	1	610	615	D-210
24	4	2	-1	616	D-210
24	4	3	612	617	D-210
24	4	4	-1	-1	D-210
24	4	5	614	618	D-210
24	4	6	-1	619	D-210
24	5	1	616	620	D-210
24	5	2	-1	-1	D-210
24	5	3	-1	-1	D-210
24	5	5	619	621	D-210
24	5	6	-1	622	D-210
24	6	1	-1	-1	D-210
24	6	5	622	-1	D-210
24	6	5	-1	-1	D-210
25	1	1	624	628	D-211
25	1	2	-1	629	D-211
25	1	3	626	630	D-211
25	1	4	-1	631	D-211
25	1	5	-1	632	D-211
25	2	1	629	633	D-211
25	2	2	-1	634	D-211
25	2	3	631	635	D-211
25	2	4	-1	636	D-211
25	2	5	-1	637	D-211
25	3	1	634	638	D-211
25	3	2	-1	639	D-211
25	3	3	636	640	D-211
25	3	4	-1	641	D-211
25	3	5	-1	642	D-211
25	4	1	639	643	D-211
25	4	2	-1	644	D-211
25	4	3	641	645	D-211
25	4	4	-1	646	D-211
25	4	5	-1	647	D-211
25	5	1	644	649	D-211
25	5	2	-1	650	D-211
25	5	3	646	651	D-211
25	5	4	-1	652	D-211
25	5	5	648	653	D-211
25	5	6	-1	654	D-211
25	6	1	650	-1	D-211
25	6	2	-1	-1	D-211
25	6	3	652	-1	D-211
25	6	4	-1	-1	D-211
25	6	5	654	-1	D-211
25	6	6	-1	-1	D-211
26	1	6	-1	661	D-214
26	2	1	657	662	D-214
26	2	2	-1	663	D-214
26	2	3	659	664	D-214
26	2	4	-1	665	D-214
26	2	5	661	666	D-214
26	2	6	-1	667	D-214
26	3	1	663	668	D-214
26	3	2	-1	669	D-214
26	3	3	665	670	D-214
26	3	4	-1	671	D-214
26	3	5	667	672	D-214
26	3	6	-1	673	D-214
26	4	1	669	674	D-214
26	4	2	-1	675	D-214
26	4	3	671	676	D-214
26	4	4	-1	677	D-214
26	4	5	673	678	D-214
26	4	6	-1	679	D-214
26	5	1	675	680	D-214
26	5	2	-1	681	D-214
26	5	3	677	682	D-214
26	5	4	-1	683	D-214
26	5	5	679	684	D-214
26	5	6	-1	685	D-214
26	6	1	681	-1	D-214
26	6	2	-1	-1	D-214
26	6	3	683	-1	D-214
26	6	4	-1	-1	D-214
26	6	5	685	-1	D-214
26	6	6	-1	-1	D-214
27	1	3	-1	689	D-216
27	2	1	688	692	D-216
27	2	2	-1	693	D-216
27	2	3	-1	694	D-216
27	2	4	691	695	D-216
27	2	5	-1	696	D-216
27	3	1	693	697	D-216
27	3	2	-1	698	D-216
27	3	3	-1	699	D-216
27	3	4	696	700	D-216
27	3	5	-1	701	D-216
27	4	1	698	702	D-216
27	4	2	-1	703	D-216
27	4	3	-1	704	D-216
27	4	4	701	705	D-216
27	4	5	-1	706	D-216
27	5	1	703	707	D-216
27	5	2	-1	708	D-216
27	5	3	-1	709	D-216
27	5	4	706	710	D-216
27	5	5	-1	711	D-216
27	6	1	708	-1	D-216
27	6	2	-1	-1	D-216
27	6	3	-1	-1	D-216
27	6	4	711	-1	D-216
27	6	5	-1	-1	D-216
28	1	3	-1	715	D-217
28	2	1	714	718	D-217
28	2	2	-1	719	D-217
28	2	3	-1	720	D-217
28	2	4	717	721	D-217
28	2	5	-1	722	D-217
28	3	1	719	723	D-217
28	3	2	-1	724	D-217
28	3	3	-1	725	D-217
28	3	4	722	726	D-217
28	3	5	-1	727	D-217
28	4	1	724	728	D-217
28	4	2	-1	729	D-217
28	4	3	-1	730	D-217
28	4	4	727	731	D-217
28	4	5	-1	732	D-217
28	5	1	729	733	D-217
28	5	2	-1	734	D-217
28	5	3	-1	735	D-217
28	5	4	732	736	D-217
28	5	5	-1	737	D-217
28	6	1	734	-1	D-217
28	6	2	-1	-1	D-217
28	6	3	-1	-1	D-217
28	6	4	737	-1	D-217
28	6	5	-1	-1	D-217
29	1	1	739	743	D-101
29	1	2	-1	744	D-101
29	1	3	-1	745	D-101
29	1	4	742	746	D-101
29	1	5	-1	747	D-101
29	2	1	744	748	D-101
29	2	2	-1	749	D-101
29	2	3	-1	750	D-101
29	2	4	747	751	D-101
29	2	5	-1	752	D-101
29	3	1	749	753	D-101
29	3	2	-1	754	D-101
29	3	3	-1	755	D-101
29	3	4	752	756	D-101
29	3	5	-1	757	D-101
29	4	1	754	758	D-101
29	4	2	-1	759	D-101
29	4	3	-1	760	D-101
29	4	4	757	761	D-101
29	4	5	-1	762	D-101
29	5	1	759	763	D-101
29	5	2	-1	764	D-101
29	5	3	-1	765	D-101
29	5	4	762	766	D-101
29	5	5	-1	767	D-101
29	6	1	764	-1	D-101
29	6	2	-1	-1	D-101
29	6	3	-1	-1	D-101
29	6	4	767	-1	D-101
29	6	5	-1	-1	D-101
30	1	1	769	773	D-102
30	1	2	-1	774	D-102
30	1	3	-1	775	D-102
30	1	4	772	776	D-102
30	1	5	-1	777	D-102
30	2	1	774	778	D-102
30	2	2	-1	779	D-102
30	2	3	-1	780	D-102
30	2	4	777	781	D-102
30	2	5	-1	782	D-102
30	3	1	779	783	D-102
30	3	2	-1	784	D-102
30	3	3	-1	785	D-102
30	3	4	782	786	D-102
30	3	5	-1	787	D-102
30	4	1	784	788	D-102
30	4	2	-1	789	D-102
30	4	3	-1	790	D-102
30	4	4	787	791	D-102
30	4	5	-1	792	D-102
30	5	1	789	793	D-102
30	5	2	-1	794	D-102
30	5	3	-1	795	D-102
30	5	4	792	796	D-102
30	5	5	-1	797	D-102
30	6	1	794	-1	D-102
30	6	2	-1	-1	D-102
30	6	3	-1	-1	D-102
30	6	4	797	-1	D-102
30	6	5	-1	-1	D-102
31	1	1	799	803	D-103
31	1	2	-1	804	D-103
31	1	3	-1	805	D-103
31	1	4	802	806	D-103
31	1	5	-1	807	D-103
31	2	1	804	808	D-103
31	2	2	-1	809	D-103
31	2	3	-1	810	D-103
31	2	4	807	811	D-103
31	2	5	-1	812	D-103
31	3	1	809	813	D-103
31	3	2	-1	814	D-103
31	3	3	-1	815	D-103
31	3	4	812	816	D-103
31	3	5	-1	817	D-103
31	4	1	814	818	D-103
31	4	2	-1	819	D-103
31	4	3	-1	820	D-103
31	4	4	817	821	D-103
31	4	5	-1	822	D-103
31	5	1	819	823	D-103
31	5	2	-1	824	D-103
31	5	3	-1	825	D-103
31	5	4	822	826	D-103
31	5	5	-1	827	D-103
31	6	1	824	-1	D-103
31	6	2	-1	-1	D-103
31	6	3	-1	-1	D-103
31	6	4	827	-1	D-103
31	6	5	-1	-1	D-103
32	1	1	829	833	D-104
32	1	2	-1	834	D-104
32	1	3	-1	835	D-104
32	1	4	832	836	D-104
32	1	5	-1	837	D-104
32	2	1	834	838	D-104
32	2	2	-1	839	D-104
32	2	3	-1	840	D-104
32	2	4	837	841	D-104
32	2	5	-1	842	D-104
32	3	1	839	843	D-104
32	3	2	-1	844	D-104
32	3	3	-1	845	D-104
32	3	4	842	846	D-104
32	3	5	-1	847	D-104
32	4	1	844	848	D-104
32	4	2	-1	849	D-104
32	4	3	-1	850	D-104
32	4	4	847	851	D-104
32	4	5	-1	852	D-104
32	5	1	849	853	D-104
32	5	2	-1	854	D-104
32	5	3	-1	855	D-104
32	5	4	852	856	D-104
32	5	5	-1	857	D-104
32	6	1	854	-1	D-104
32	6	2	-1	-1	D-104
32	6	3	-1	-1	D-104
32	6	4	857	-1	D-104
32	6	5	-1	-1	D-104
33	1	1	859	863	D-105
33	1	2	-1	864	D-105
33	1	3	-1	865	D-105
33	1	4	862	866	D-105
33	1	5	-1	867	D-105
33	2	1	864	868	D-105
33	2	2	-1	869	D-105
33	2	3	-1	870	D-105
33	2	4	867	871	D-105
33	2	5	-1	872	D-105
33	3	1	869	873	D-105
33	3	2	-1	874	D-105
33	3	3	-1	875	D-105
33	3	4	872	876	D-105
33	3	5	-1	877	D-105
33	4	1	874	878	D-105
33	4	2	-1	879	D-105
33	4	3	-1	880	D-105
33	4	4	877	881	D-105
33	4	5	-1	882	D-105
33	5	1	879	883	D-105
33	5	2	-1	884	D-105
33	5	3	-1	885	D-105
33	5	4	882	886	D-105
33	5	5	-1	887	D-105
33	6	1	884	-1	D-105
33	6	2	-1	-1	D-105
33	6	3	-1	-1	D-105
33	6	4	887	-1	D-105
33	6	5	-1	-1	D-105
34	1	1	889	893	D-106
34	1	2	-1	894	D-106
34	1	3	-1	895	D-106
34	1	4	892	896	D-106
34	1	5	-1	897	D-106
34	2	1	894	898	D-106
34	2	2	-1	899	D-106
34	2	3	-1	900	D-106
34	2	4	897	901	D-106
34	2	5	-1	902	D-106
34	3	1	899	903	D-106
34	3	2	-1	904	D-106
34	3	3	-1	905	D-106
34	3	4	902	906	D-106
34	3	5	-1	907	D-106
34	4	1	904	908	D-106
34	4	2	-1	909	D-106
34	4	3	-1	910	D-106
34	4	4	907	911	D-106
34	4	5	-1	912	D-106
34	5	1	909	913	D-106
34	5	2	-1	914	D-106
34	5	3	-1	915	D-106
34	5	4	912	916	D-106
34	5	5	-1	917	D-106
34	6	1	914	-1	D-106
34	6	2	-1	-1	D-106
34	6	3	-1	-1	D-106
34	6	4	917	-1	D-106
34	6	5	-1	-1	D-106
35	1	1	919	923	D-107
35	1	2	-1	924	D-107
35	1	3	-1	925	D-107
35	1	4	922	926	D-107
35	1	5	-1	927	D-107
35	2	1	924	928	D-107
35	2	2	-1	929	D-107
35	2	3	-1	930	D-107
35	2	4	927	931	D-107
35	2	5	-1	932	D-107
35	3	1	929	933	D-107
35	3	2	-1	934	D-107
35	3	3	-1	935	D-107
35	3	4	932	936	D-107
35	3	5	-1	937	D-107
35	4	1	934	938	D-107
35	4	2	-1	939	D-107
35	4	3	-1	940	D-107
35	4	4	937	941	D-107
35	4	5	-1	942	D-107
35	5	1	939	943	D-107
35	5	2	-1	944	D-107
35	5	3	-1	945	D-107
35	5	4	942	946	D-107
35	5	5	-1	947	D-107
35	6	1	944	-1	D-107
35	6	2	-1	-1	D-107
35	6	3	-1	-1	D-107
35	6	4	947	-1	D-107
35	6	5	-1	-1	D-107
36	1	1	949	953	D-108
36	1	2	-1	954	D-108
36	1	3	-1	955	D-108
36	1	4	952	956	D-108
36	1	5	-1	957	D-108
36	2	1	954	958	D-108
36	2	2	-1	959	D-108
36	2	3	-1	960	D-108
36	2	4	957	961	D-108
36	2	5	-1	962	D-108
36	3	1	959	963	D-108
36	3	2	-1	964	D-108
36	3	3	-1	965	D-108
36	3	4	962	966	D-108
36	3	5	-1	967	D-108
36	4	1	964	968	D-108
36	4	2	-1	969	D-108
36	4	3	-1	970	D-108
36	4	4	967	971	D-108
36	4	5	-1	972	D-108
36	5	1	969	973	D-108
36	5	2	-1	974	D-108
36	5	3	-1	975	D-108
36	5	4	972	976	D-108
36	5	5	-1	977	D-108
36	6	1	974	-1	D-108
36	6	2	-1	-1	D-108
36	6	3	-1	-1	D-108
36	6	4	977	-1	D-108
36	6	5	-1	-1	D-108
37	1	1	979	983	D-109
37	1	2	-1	984	D-109
37	1	3	-1	985	D-109
37	1	4	982	986	D-109
37	1	5	-1	987	D-109
37	2	1	984	988	D-109
37	2	2	-1	989	D-109
37	2	3	-1	990	D-109
37	2	4	987	991	D-109
37	2	5	-1	992	D-109
37	3	1	989	993	D-109
37	3	2	-1	994	D-109
37	3	3	-1	995	D-109
37	3	4	992	996	D-109
37	3	5	-1	997	D-109
37	4	1	994	998	D-109
37	4	2	-1	999	D-109
37	4	3	-1	1000	D-109
37	4	4	997	1001	D-109
37	4	5	-1	1002	D-109
37	5	1	999	1003	D-109
37	5	2	-1	1004	D-109
37	5	3	-1	1005	D-109
37	5	4	1002	1006	D-109
37	5	5	-1	1007	D-109
37	6	1	1004	-1	D-109
37	6	2	-1	-1	D-109
37	6	3	-1	-1	D-109
37	6	4	1007	-1	D-109
37	6	5	-1	-1	D-109
38	1	1	1009	1013	D-111
38	1	2	-1	1014	D-111
38	1	3	-1	1015	D-111
38	1	4	1012	1016	D-111
38	1	5	-1	1017	D-111
38	2	1	1014	1018	D-111
38	2	2	-1	1019	D-111
38	2	3	-1	1020	D-111
38	2	4	1017	1021	D-111
38	2	5	-1	1022	D-111
38	3	1	1019	1023	D-111
38	3	2	-1	1024	D-111
38	3	3	-1	1025	D-111
38	3	4	1022	1026	D-111
38	3	5	-1	1027	D-111
38	4	1	1024	1028	D-111
38	4	2	-1	1029	D-111
38	4	3	-1	1030	D-111
38	4	4	1027	1031	D-111
38	4	5	-1	1032	D-111
38	5	1	1029	1033	D-111
38	5	2	-1	1034	D-111
38	5	3	-1	1035	D-111
38	5	4	1032	1036	D-111
38	5	5	-1	1037	D-111
38	6	1	1034	-1	D-111
38	6	2	-1	-1	D-111
38	6	3	-1	-1	D-111
38	6	4	1037	-1	D-111
38	6	5	-1	-1	D-111
39	1	1	1039	1043	D-113
39	1	2	-1	1044	D-113
39	1	3	-1	1045	D-113
39	1	4	1042	1046	D-113
39	1	5	-1	1047	D-113
39	2	1	1044	1048	D-113
39	2	2	-1	1049	D-113
39	2	3	-1	1050	D-113
39	2	4	1047	1051	D-113
39	2	5	-1	1052	D-113
39	3	1	1049	1053	D-113
39	3	2	-1	1054	D-113
39	3	3	-1	1055	D-113
39	3	4	1052	1056	D-113
39	3	5	-1	1057	D-113
39	4	1	1054	1058	D-113
39	4	2	-1	1059	D-113
39	4	3	-1	1060	D-113
39	4	4	1057	1061	D-113
39	4	5	-1	1062	D-113
39	5	1	1059	-1	D-113
39	5	2	-1	-1	D-113
39	5	3	-1	-1	D-113
39	5	4	1062	-1	D-113
39	5	5	-1	1063	D-113
39	6	5	-1	-1	D-113
40	1	1	1065	1069	D-114
40	1	2	-1	1070	D-114
40	1	3	-1	1071	D-114
40	1	4	1068	1072	D-114
40	1	5	-1	1073	D-114
40	2	1	1070	1074	D-114
40	2	2	-1	1075	D-114
40	2	3	-1	1076	D-114
40	2	4	1073	1077	D-114
40	2	5	-1	1078	D-114
40	3	1	1075	1079	D-114
40	3	2	-1	1080	D-114
40	3	3	-1	1081	D-114
40	3	4	1078	1082	D-114
40	3	5	-1	1083	D-114
40	4	1	1080	1084	D-114
40	4	2	-1	1085	D-114
40	4	3	-1	1086	D-114
40	4	4	1083	1087	D-114
40	4	5	-1	1088	D-114
40	5	1	1085	1089	D-114
40	5	2	-1	-1	D-114
40	5	3	-1	-1	D-114
40	5	4	1088	-1	D-114
40	5	5	-1	1090	D-114
40	6	1	-1	-1	D-114
40	6	5	-1	-1	D-114
