# Supplementary material for: Flood algorithm: a novel metaheuristic algorithm for optimization problems
Source: PeerJ Comput Sci. 2024 Oct 2;10:e2278. doi: 10.7717/peerj-cs.2278 (PMC11623059; doi:10.7717/peerj-cs.2278)
Supplement: Supplemental Information 17 [file peerj-cs-10-2278-s017.xlsx]

## Sheet: Sayfa1
1	2	3	4	5	6	7	8	9	10	11
1	1	1	1	1	1	1	1	1	1	1
1	1	1	1	1	1	1	1	1	1	1
1	1	1	1	1	1	1	1	1	1	1
1	1	1	1	1	1	1	1	1	1	1
1	1	1	1	1	1	1	1	1	1	1
1	1	1	1	1	1	1	1	1	1	1
1	1	1	1	1	1	1	1	1	1	1
1	1	1	1	1	1	1	1	1	1	1
1	1	1	1	1	1	1	1	1	1	1
1	1	1	1	1	1	1	1	1	1	1
1	1	1	1	1	1	1	1	1	1	1
1	1	1	1	1	1	1	1	1	1	1
1	1	1	1	1	1	1	1	1	1	1
1	1	1	1	1	1	1	1	1	1	1
1	1	1	1	1	1	1	1	1	1	1
1	1	1	1	1	1	1	1	1	1	1
1	1	1	1	1	1	1	1	1	1	1
1	1	1	1	1	1	1	1	1	1	1
1	1	1	1	1	1	1	1	1	1	1
1	1	1	1	1	1	1	1	1	1	1
1	1	1	1	1	1	1	1	1	1	1
1	1	1	1	1	1	1	1	1	1	1
1	1	1	1	1	1	1	1	1	1	1
1	1	1	1	1	1	1	1	1	1	1
1	1	1	1	1	1	1	1	1	1	1
1	1	1	1	1	1	1	1	1	1	1
1	1	1	1	1	1	1	1	1	1	1
1	1	1	1	1	1	1	1	1	1	1
1	1	1	1	1	1	1	1	1	1	1
1	1	1	1	1	1	1	1	1	1	1
1	1	1	1	1	1	1	1	1	1	1
1	1	1	1	1	1	1	1	1	1	1
1	1	1	1	1	1	1	1	1	1	1
1	1	1	1	1	1	1	1	1	1	1
1	1	1	1	1	1	1	1	1	1	1
1	1	1	1	1	1	1	1	1	1	1
1	1	1	1	1	1	1	1	1	1	1
1	1	1	1	1	1	1	1	1	1	1
1	1	1	1	1	1	1	1	1	1	1
1	1	1	1	1	1	1	1	1	1	1
1	1	1	1	1	1	1	1	1	1	1
1	1	1	1	1	1	1	1	1	1	1
1	1	1	1	1	1	1	1	1	1	1
1	1	1	1	1	1	1	1	1	1	1
1	1	1	1	1	1	1	1	1	1	1
1	1	1	1	1	1	1	1	1	1	1
1	1	1	1	1	1	1	1	1	1	1
1	1	1	1	1	1	1	1	1	1	1
1	1	1	1	1	1	1	1	1	1	1
1	1	1	1	1	1	1	1	1	1	1
1	1	1	1	1	1	1	1	1	1	1
1	1	1	1	1	1	1	1	1	1	1
1	1	1	1	1	1	1	1	1	1	1
1	1	1	1	1	1	1	1	1	1	1
1	1	1	1	1	1	1	1	1	1	1
1	1	1	1	1	1	1	1	1	1	1
1	1	1	1	1	1	1	1	1	1	1
1	1	1	1	1	1	1	1	1	1	1
1	1	1	1	1	1	1	1	1	1	1
1	1	1	1	1	1	1	1	1	1	1
1	1	1	1	1	1	1	1	1	1	1
1	1	1	1	1	1	1	1	1	1	1
1	1	1	1	1	1	1	1	1	1	1
1	1	1	1	1	1	1	1	1	1	1
1	1	1	1	1	1	1	1	1	1	1
1	1	1	1	1	1	1	1	1	1	1
1	1	1	1	1	1	1	1	1	1	1
1	1	1	1	1	1	1	1	1	1	1
1	1	1	1	1	1	1	1	1	1	1
1	1	1	1	1	1	1	1	1	1	1
1	1	1	1	1	1	1	1	1	1	1
1	1	1	1	1	1	1	1	1	1	1
1	1	1	1	1	1	1	1	1	1	1
1	1	1	1	1	1	1	1	1	1	1
1	1	1	1	1	1	1	1	1	1	1
1	1	1	1	1	1	1	1	1	1	1
1	1	1	1	1	1	1	1	1	1	1
1	1	1	1	1	1	1	1	1	1	1
1	1	1	1	1	1	1	1	1	1	1
1	1	1	1	1	1	1	1	1	1	1
1	1	1	1	1	1	1	1	1	1	1
1	1	1	1	1	1	1	1	1	1	1
1	1	1	1	1	1	1	1	1	1	1
1	1	1	1	1	1	1	1	1	1	1
1	1	1	1	1	1	1	1	1	1	1
1	1	1	1	1	1	1	1	1	1	1
1	1	1	1	1	1	1	1	1	1	1
1	1	1	1	1	1	1	1	1	1	1
1	1	1	1	1	1	1	1	1	1	1
1	1	1	1	1	1	1	1	1	1	1
1	1	1	1	1	1	1	1	1	1	1
1	1	1	1	1	1	1	1	1	1	1
1	1	1	1	1	1	1	1	1	1	1
1	1	1	1	1	1	1	1	1	1	1
1	1	1	1	1	1	1	1	1	1	1
1	1	1	1	1	1	1	1	1	1	1
1	1	1	1	1	1	1	1	1	1	1
1	1	1	1	1	1	1	1	1	1	1
1	1	1	1	1	1	1	1	1	1	1
1	1	1	1	1	1	1	1	1	1	1
1	1	1	1	1	1	1	1	1	1	1
1	1	1	1	1	1	1	1	1	1	1
1	1	1	1	1	1	1	1	1	1	1
1	1	1	1	1	1	1	1	1	1	1
1	1	1	1	1	1	1	1	1	1	1
1	1	1	1	1	1	1	1	1	1	1
1	1	1	1	1	1	1	1	1	1	1
1	1	1	1	1	1	1	1	1	1	1
1	1	1	1	1	1	1	1	1	1	1
1	1	1	1	1	1	1	1	1	1	1
1	1	1	1	1	1	1	1	1	1	1
1	1	1	1	1	1	1	1	1	1	1
1	1	1	1	1	2	1	1	1	1	1
1	1	1	1	1	2	1	1	1	1	1
1	1	1	1	1	2	1	1	1	1	1
1	1	1	1	1	2	1	1	1	1	1
1	1	1	1	1	2	1	1	1	1	1
1	1	1	1	1	2	1	1	1	1	1
1	1	1	1	1	2	1	1	1	1	1
1	1	1	1	1	2	1	1	1	1	1
1	1	1	1	1	2	1	1	1	1	1
1	1	1	1	1	2	1	1	1	1	1
1	1	1	1	1	2	1	1	1	1	1
1	1	1	1	1	2	1	1	1	1	1
1	1	1	1	1	2	1	1	1	1	1
1	1	1	1	1	2	1	1	1	1	1
1	1	1	1	1	2	1	1	1	1	1
1	1	1	1	1	2	1	1	1	1	1
1	1	1	1	1	2	1	1	1	1	1
1	1	1	1	1	2	1	1	1	1	1
1	1	1	1	1	2	1	1	1	1	1
1	1	1	1	1	2	1	1	1	1	1
1	1	1	1	1	2	1	1	1	1	1
1	1	1	1	1	2	1	1	1	1	1
1	1	1	1	1	2	1	1	1	1	1
1	1	1	1	1	2	1	1	1	1	1
1	1	1	1	1	2	1	1	1	1	1
1	1	1	1	1	2	1	1	1	1	1
1	1	1	1	1	2	1	1	1	1	1
1	1	1	1	1	2	1	1	1	1	1
1	1	1	1	1	2	1	1	1	1	1
1	1	1	1	1	2	1	1	1	1	1
1	1	1	1	1	2	1	1	1	1	1
1	1	1	1	1	2	1	1	1	1	1
1	1	1	1	1	2	1	1	1	1	1
1	1	1	1	1	2	1	1	1	1	1
1	1	1	1	1	2	1	1	1	1	1
1	1	1	1	1	2	1	1	1	1	1
1	1	1	1	1	2	1	1	1	1	1
1	1	1	1	1	2	1	1	1	1	1
1	1	1	1	1	2	1	1	1	1	1
1	1	1	1	1	2	1	1	1	1	1
1	1	1	1	1	2	1	1	1	1	1
1	1	1	1	1	2	1	1	1	1	1
1	1	1	1	1	2	1	1	1	1	1
1	1	1	1	1	2	1	1	1	1	1
1	1	1	1	1	2	1	1	1	1	1
1	1	1	1	1	2	1	1	1	1	1
1	1	1	1	1	2	1	1	1	1	1
1	1	1	1	1	2	1	1	1	1	1
1	1	1	1	1	2	1	1	1	1	1
1	1	1	1	1	2	1	1	1	1	1
1	1	1	1	1	2	1	1	1	1	1
1	1	1	1	1	2	1	1	1	1	1
1	1	1	1	1	2	1	1	1	1	1
1	1	1	1	1	2	1	1	1	1	1
1	1	1	1	1	2	1	1	1	1	1
1	1	1	1	1	2	1	1	1	1	1
1	1	1	1	1	2	1	1	1	1	1
1	1	1	1	1	2	1	1	1	1	1
1	1	1	1	1	2	1	1	1	1	1
1	1	1	1	1	2	1	1	1	1	1
1	1	1	1	1	2	1	1	1	1	1
1	1	1	1	1	2	1	1	1	1	1
1	1	1	1	1	2	1	1	1	1	1
1	1	1	1	1	2	1	1	1	1	1
1	1	1	1	1	2	1	1	1	1	1
1	1	1	1	1	2	1	1	1	1	1
1	1	1	1	1	2	1	1	1	1	1
1	1	1	1	1	2	1	1	1	1	1
1	1	1	1	1	2	1	1	1	1	1
1	1	1	1	1	2	1	1	1	1	1
1	1	1	1	1	2	1	1	1	1	1
1	1	1	1	1	2	1	1	1	1	1
1	1	1	1	1	2	1	1	1	1	1
1	1	1	1	1	2	1	1	1	1	1
1	1	1	1	1	2	1	1	1	1	1
1	1	1	1	1	2	1	1	1	1	1
1	1	1	1	1	2	1	1	1	1	1
1	1	1	1	1	2	1	1	1	1	1
1	1	1	1	1	2	1	1	1	1	1
1	1	1	1	1	2	1	1	1	1	1
1	1	1	1	1	2	1	1	1	1	1
1	1	1	1	1	2	1	1	1	1	1
1	1	1	1	1	2	1	1	1	1	1
1	1	1	1	1	2	1	1	1	1	1
1	1	1	1	1	2	1	1	1	1	1
1	1	1	1	1	2	1	1	1	1	1
1	1	1	1	1	2	1	1	1	1	1
1	1	1	1	1	2	1	1	1	1	1
1	1	1	1	1	2	1	1	1	1	1
1	1	1	1	1	2	1	1	1	1	1
1	1	1	1	1	2	1	1	1	1	1
1	1	1	1	1	2	1	1	1	1	1
1	1	1	2	1	2	1	1	1	1	1
1	1	1	2	1	2	1	1	1	1	1
1	1	1	2	1	2	1	1	1	1	1
1	1	1	2	1	2	1	1	1	1	1
1	1	1	2	1	2	1	1	1	1	1
1	1	1	2	1	2	1	1	1	1	1
1	1	1	2	1	2	1	1	1	1	1
1	1	1	2	1	2	2	1	1	1	1
1	1	2	2	1	2	2	1	1	1	1
1	2	2	2	1	2	2	1	1	1	1
1	2	2	2	1	2	2	1	1	1	1
1	2	2	2	1	3	2	1	1	1	1
1	2	2	2	1	3	2	1	1	1	1
1	2	2	2	1	3	2	1	1	1	1
1	2	2	2	1	3	2	1	1	1	1
1	2	2	2	1	3	2	1	1	1	1
1	2	2	2	1	3	2	1	1	1	1
1	2	2	2	1	3	2	1	1	1	1
1	2	2	2	1	3	2	2	1	1	2
2	2	2	2	1	3	2	2	1	1	2
2	2	2	2	1	3	2	2	1	1	2
2	2	2	2	1	3	2	2	1	1	2
2	2	2	2	1	3	2	2	1	1	2
2	2	2	2	1	3	2	2	1	1	2
2	2	2	2	1	3	2	2	1	1	2
2	2	2	2	1	3	2	2	1	1	2
2	2	2	2	1	3	2	2	1	1	2
2	2	2	2	1	3	2	2	1	1	2
2	2	2	2	1	3	2	2	1	1	2
2	2	2	2	1	3	2	2	1	1	2
2	2	2	2	1	3	2	2	1	2	2
2	2	2	2	1	3	2	2	1	2	2
2	2	2	2	1	3	2	2	1	2	2
2	2	2	2	1	3	2	2	1	2	2
2	2	2	2	1	3	2	2	1	2	2
2	2	2	2	1	3	2	2	1	2	2
2	2	2	2	1	3	2	2	1	2	2
2	2	2	2	1	3	2	2	1	2	2
2	2	2	2	1	3	2	2	1	2	2
2	2	2	2	1	3	2	2	1	2	2
2	2	2	2	1	3	2	2	1	2	2
2	2	2	2	1	3	2	2	1	2	2
2	2	2	2	1	3	2	2	1	2	2
2	2	2	2	1	3	2	2	1	2	2
2	2	2	2	1	3	2	2	1	2	2
2	2	2	2	1	3	2	2	1	2	2
2	2	2	2	1	3	2	2	1	2	2
2	2	2	2	1	3	2	2	1	2	2
2	2	2	2	2	3	2	2	1	2	2
2	2	2	2	2	3	2	2	1	2	2
2	2	2	2	2	3	2	2	1	2	2
2	2	2	2	2	3	2	2	1	2	2
2	2	2	2	2	3	2	2	1	2	2
2	2	2	2	2	3	2	2	1	2	2
2	2	2	2	2	3	2	2	1	2	2
2	2	2	2	2	3	2	2	1	2	2
2	2	2	2	2	3	2	2	1	2	2
2	2	2	2	2	3	2	2	1	2	2
2	2	2	2	2	3	2	2	1	2	2
2	2	2	2	2	3	2	2	1	2	2
2	2	2	2	2	3	2	2	1	2	2
2	2	2	2	2	3	2	2	1	2	2
2	2	2	2	2	3	2	2	1	2	2
2	2	2	2	2	3	2	2	1	2	2
2	2	2	2	2	3	2	2	1	2	2
2	2	2	2	2	3	2	2	1	2	2
2	2	2	2	2	3	2	2	1	2	2
2	2	2	2	2	3	2	2	1	2	2
2	2	2	2	2	3	2	2	1	2	2
2	2	2	2	2	3	2	2	1	2	2
2	2	2	2	2	3	2	2	1	2	2
2	2	2	2	2	3	2	2	1	2	2
2	2	2	2	2	3	2	2	1	2	2
2	2	2	2	2	3	2	2	1	2	2
2	2	2	2	2	3	2	2	1	2	2
2	2	2	2	2	3	2	2	1	2	2
2	2	2	2	2	3	2	2	1	2	2
2	2	2	2	2	3	2	2	1	2	2
2	2	2	2	2	3	2	2	1	2	2
2	2	2	2	2	3	2	2	1	2	2
2	2	2	2	2	3	2	2	1	2	2
2	2	2	2	2	3	2	2	1	2	2
2	2	2	2	2	3	2	2	1	2	2
2	2	2	2	2	3	2	2	1	2	2
2	2	2	2	2	3	2	2	1	2	2
2	2	2	2	2	3	2	2	1	2	2
2	2	2	2	2	3	2	2	2	2	2
2	2	2	2	2	3	2	2	2	2	2
2	2	2	2	2	3	2	2	2	2	2
2	2	2	2	2	3	2	2	2	2	2
2	2	2	2	2	3	2	2	2	2	2
2	2	2	2	2	3	2	2	2	2	2
2	2	2	2	2	3	2	2	2	2	2
2	2	2	2	2	3	2	2	2	2	2
2	2	2	2	2	3	2	2	2	2	2
2	2	2	2	2	3	2	2	2	2	2
2	2	2	2	2	3	2	2	2	2	2
2	2	2	2	2	3	2	2	2	2	2
2	2	2	2	2	3	2	2	2	2	2
2	2	2	2	2	3	2	2	2	2	2
2	2	2	2	2	3	2	2	2	2	2
2	2	2	2	2	3	2	2	2	2	2
2	2	2	2	2	4	2	2	2	2	2
2	2	2	2	2	4	2	2	2	2	2
2	2	2	2	2	4	2	2	2	2	2
2	2	2	2	2	4	2	2	2	2	2
2	2	2	2	2	4	2	2	2	2	2
2	2	2	2	2	4	2	2	2	2	2
2	2	2	2	2	4	2	2	2	2	2
2	2	2	2	2	4	2	2	2	2	2
2	2	2	2	2	4	2	2	2	2	2
2	2	2	2	2	4	2	2	2	2	2
2	2	2	2	2	4	2	2	2	2	2
2	2	2	2	2	4	2	2	2	2	2
2	2	2	2	2	4	2	2	2	2	3
2	2	2	2	2	4	2	2	2	2	3
2	2	2	2	2	4	2	2	2	2	3
2	2	2	2	2	4	2	2	2	2	3
2	2	2	2	2	4	2	2	2	2	3
2	2	2	2	2	4	2	2	2	2	3
2	2	2	2	2	4	2	3	2	2	3
2	2	2	2	2	4	2	3	2	2	3
2	2	2	2	2	4	2	3	2	2	3
3	2	2	2	2	4	2	3	2	2	3
3	2	2	2	2	4	2	3	2	2	3
3	2	2	2	2	4	2	3	2	2	3
3	2	2	2	2	4	2	3	2	2	3
3	2	2	2	2	4	2	3	2	2	3
3	2	2	2	2	4	2	3	2	2	3
3	2	2	2	2	4	2	3	2	2	3
3	2	2	2	2	4	2	3	2	2	3
3	2	2	2	2	4	2	3	2	2	3
3	2	2	2	2	4	2	3	2	2	3
3	2	2	2	2	4	2	3	2	2	3
3	2	2	2	2	4	2	3	2	2	3
3	2	2	2	2	4	2	3	2	2	3
3	2	2	2	2	4	2	3	2	2	3
3	2	2	2	2	4	2	3	2	2	3
3	2	2	2	2	4	2	3	2	2	3
3	2	2	2	2	4	2	3	2	2	3
3	3	2	2	2	4	2	3	2	2	3
3	3	2	2	2	4	2	3	2	2	3
3	3	2	2	2	4	2	3	2	2	3
3	3	2	2	2	4	2	3	2	2	3
3	3	2	2	2	4	2	3	2	2	3
3	3	2	2	2	4	2	3	2	2	3
3	3	2	2	2	4	2	3	2	2	3
3	3	2	2	2	4	2	3	2	2	3
3	3	2	2	2	4	2	3	2	2	3
3	3	2	2	2	4	2	3	2	2	3
3	3	2	2	2	4	2	3	2	2	3
3	3	2	2	2	4	2	3	2	2	3
3	3	2	2	2	4	2	3	2	2	3
3	3	2	2	2	4	2	3	2	2	3
3	3	2	2	2	4	2	3	2	2	3
3	3	2	2	2	4	2	3	2	2	3
3	3	2	2	2	4	2	3	2	2	3
3	3	2	2	2	4	2	3	2	2	3
3	3	2	2	2	4	2	3	2	2	3
3	3	2	2	2	4	2	3	2	2	3
3	3	2	2	3	4	2	3	2	2	3
3	3	2	2	3	4	2	3	2	2	3
3	3	2	2	3	4	2	3	2	2	3
3	3	2	2	3	4	2	3	2	2	3
3	3	2	2	3	4	2	3	2	2	3
3	3	2	2	3	4	2	3	2	2	3
3	3	2	2	3	4	2	3	2	2	3
3	3	2	2	3	4	2	3	2	2	3
3	3	2	2	3	5	2	3	2	2	3
3	3	2	2	3	5	3	3	2	2	3
3	3	2	2	3	5	3	3	2	2	3
3	3	2	2	3	5	3	3	2	2	3
3	3	2	2	3	5	3	3	2	2	3
3	3	2	2	3	5	3	3	2	2	3
3	3	3	2	3	5	3	3	2	2	3
3	3	3	2	3	5	3	3	2	2	3
3	3	3	2	3	5	3	3	2	2	3
3	3	3	2	3	5	3	3	2	2	3
3	3	3	2	3	5	3	3	2	2	3
3	3	3	2	3	5	3	3	2	2	4
3	3	3	2	3	5	3	3	2	2	4
3	3	3	2	3	5	3	3	2	2	4
3	3	3	2	3	5	3	3	2	2	4
3	3	3	2	3	5	3	3	2	2	4
3	3	3	2	3	5	3	3	2	2	4
3	3	3	2	3	5	3	3	2	2	4
3	3	3	2	3	5	3	3	2	2	4
3	3	3	2	3	5	3	3	2	2	4
4	3	3	2	3	5	3	3	2	2	4
4	3	3	2	3	5	3	3	2	2	4
4	3	3	2	3	5	3	3	2	2	4
4	3	3	3	3	5	3	3	2	2	4
4	3	3	3	3	5	3	3	2	2	4
4	3	3	3	3	5	3	3	2	2	4
4	3	3	3	3	5	3	3	2	2	4
4	3	3	3	3	5	3	3	2	2	4
4	3	3	3	3	5	3	3	2	3	4
4	3	3	3	3	5	3	3	2	3	4
4	3	3	3	3	5	3	3	2	3	4
4	3	3	3	3	5	3	3	2	3	4
4	3	3	3	3	5	3	3	2	3	4
4	3	3	3	3	5	3	3	2	3	4
4	3	3	3	3	5	3	3	2	3	4
4	3	3	3	3	5	3	3	2	3	4
4	3	3	3	3	5	3	3	2	3	4
4	3	3	3	3	5	3	3	2	3	4
4	3	3	3	3	5	3	3	2	3	4
4	3	3	3	3	5	3	3	2	3	4
4	3	3	3	3	5	3	3	2	3	4
4	3	3	3	3	5	3	3	2	3	4
4	3	3	3	3	5	3	3	2	3	4
4	3	3	3	3	5	3	3	2	3	4
4	3	3	3	3	5	3	3	2	3	4
4	3	3	3	3	5	3	3	2	3	4
4	3	3	3	3	5	3	3	2	3	4
4	3	3	3	3	5	3	3	2	3	4
4	3	3	3	3	5	3	3	2	3	4
4	3	3	3	3	5	3	4	2	3	4
4	3	3	3	3	5	3	4	2	3	4
4	3	3	3	3	5	3	4	2	3	4
4	3	3	3	3	5	3	4	2	3	4
4	3	3	3	3	5	3	4	2	3	4
4	3	3	3	3	5	3	4	2	3	4
4	3	3	3	3	5	3	4	2	3	4
4	3	3	3	3	6	3	4	2	3	4
4	3	3	3	3	6	3	4	2	3	4
4	3	3	3	3	6	3	4	2	3	4
4	3	3	3	3	6	3	4	2	3	4
4	3	3	3	3	6	3	4	2	3	4
4	3	3	3	3	6	3	4	2	3	4
4	3	3	3	3	6	3	0	2	3	4
4	3	3	3	3	6	3	0	2	3	4
4	3	3	3	3	6	3	0	2	3	4
4	3	3	3	3	6	3	0	2	3	4
4	3	3	3	3	6	3	0	2	3	4
4	3	3	3	3	6	3	0	2	3	4
4	3	3	3	3	6	3	0	2	3	4
4	3	3	3	3	6	3	0	2	3	4
4	3	3	3	3	6	3	0	2	3	4
4	3	3	3	3	6	3	0	2	3	4
4	3	3	3	3	6	3	0	2	3	4
4	3	3	3	3	6	3	0	2	3	4
4	3	3	3	3	6	3	0	2	3	4
4	3	3	3	3	6	3	0	2	3	4
4	3	3	3	3	6	3	0	2	3	5
4	3	3	3	3	6	3	0	2	3	5
4	3	3	3	3	6	3	0	2	3	5
4	3	3	3	3	6	3	0	2	3	5
4	3	3	3	3	6	3	0	2	3	5
4	3	3	3	3	6	3	0	2	3	5
4	3	3	3	3	6	3	0	2	3	5
4	3	3	3	3	6	3	0	2	3	5
4	3	3	3	3	6	3	0	2	3	5
5	3	3	3	3	6	3	0	2	3	5
5	3	3	3	3	6	3	0	2	3	5
5	3	3	3	3	6	3	0	2	3	5
5	3	3	3	3	6	3	0	2	3	5
5	3	3	3	3	6	3	0	2	3	5
5	3	3	3	3	6	3	0	2	3	5
5	3	3	3	3	6	3	0	2	3	5
5	3	3	3	3	6	3	0	2	3	5
5	4	3	3	3	6	3	0	2	3	5
5	4	3	3	3	6	3	0	2	3	5
5	4	3	3	3	6	3	0	2	3	5
5	4	3	3	3	6	3	0	2	3	5
5	4	3	3	3	6	3	0	2	3	5
5	4	3	3	3	6	3	0	2	3	5
5	4	3	3	3	6	3	0	2	3	5
5	4	3	3	3	7	3	0	2	3	5
5	4	3	3	3	7	3	0	2	3	5
5	4	3	3	3	7	3	0	2	3	5
5	4	3	3	4	7	3	0	2	3	5
5	4	3	3	4	7	4	0	2	3	5
5	4	3	3	4	7	4	0	2	3	5
5	4	3	3	4	7	4	0	2	3	5
5	4	3	3	4	7	4	0	2	3	5
5	4	3	3	4	7	4	0	2	3	5
5	4	3	3	4	7	4	0	2	3	5
5	4	3	3	4	7	4	0	2	3	5
5	4	3	3	4	7	4	0	2	3	5
5	4	3	3	4	7	4	0	2	3	5
5	4	3	3	4	7	4	0	2	3	5
5	4	3	3	4	7	4	0	2	3	5
5	4	3	3	4	7	4	0	2	3	5
5	4	3	3	4	7	4	0	2	3	5
5	4	3	3	4	7	4	0	2	3	5
5	4	3	3	4	7	4	0	2	3	5
5	4	3	3	4	7	4	0	2	3	5
5	4	3	3	4	7	4	0	2	3	5
5	4	3	3	4	7	4	0	2	3	5
5	4	3	3	4	7	4	0	2	3	5
5	4	3	3	4	7	4	0	2	3	5
5	4	3	3	4	7	4	0	2	3	5
5	4	3	3	4	7	4	0	2	3	5
5	4	3	3	4	8	4	0	2	3	5
5	4	3	3	4	8	4	0	2	3	5
5	4	3	3	4	8	4	0	2	3	5
5	4	3	3	4	8	4	0	2	3	5
5	4	3	3	4	8	4	0	2	3	5
5	4	3	3	4	8	4	0	2	3	5
5	4	3	3	4	8	4	0	2	3	5
5	4	3	3	4	8	4	0	2	3	5
5	4	3	4	4	8	4	0	2	3	5
5	4	3	4	4	8	4	0	2	3	5
5	4	3	4	4	8	4	0	2	3	6
5	4	4	4	4	8	4	0	2	3	6
5	4	4	4	4	8	4	0	2	3	6
5	4	4	4	4	8	4	0	2	3	6
5	4	4	4	4	8	4	0	3	3	6
5	4	4	4	4	8	4	0	3	3	6
5	4	4	4	4	8	4	0	3	3	6
5	4	4	4	4	8	4	0	3	3	6
6	4	4	4	4	8	4	0	3	3	6
6	4	4	4	4	8	4	0	3	3	6
6	4	4	4	4	8	4	0	3	3	6
6	4	4	4	4	8	4	0	3	3	6
6	4	4	4	4	9	4	0	3	3	6
6	4	4	4	4	9	4	0	3	4	6
6	4	4	4	4	9	4	0	3	4	6
6	4	4	4	4	9	4	0	3	4	6
6	4	4	4	4	9	4	0	3	4	6
6	4	4	4	4	9	4	0	3	4	6
6	4	4	4	4	9	4	0	3	4	6
6	4	4	4	4	9	4	0	3	4	6
6	4	4	4	4	9	4	0	3	4	6
6	4	4	4	4	9	4	0	3	4	6
6	4	4	4	4	9	4	0	3	4	6
6	4	4	4	4	9	4	0	3	4	6
6	4	4	4	4	9	4	0	3	4	6
6	4	4	4	4	9	4	0	3	4	6
6	4	4	4	4	9	4	0	3	4	6
6	4	4	4	4	9	4	0	3	4	6
6	4	4	4	4	9	4	0	3	4	6
6	4	4	4	4	9	4	0	3	4	6
6	4	4	4	4	9	4	0	3	4	6
6	4	4	4	4	9	4	0	3	4	6
6	4	4	4	4	9	4	0	3	4	6
6	4	4	4	4	9	4	0	3	4	6
6	4	4	4	4	10	4	0	3	4	6
6	4	4	4	4	10	4	0	3	4	6
6	4	4	4	4	10	4	0	3	4	6
6	4	4	4	4	10	4	0	3	4	6
6	4	4	4	4	10	4	0	3	4	6
6	4	4	4	4	10	4	0	3	4	6
6	4	4	4	4	10	4	0	3	4	6
6	4	4	4	4	10	4	0	3	4	6
6	4	4	4	4	10	4	0	3	4	6
6	4	4	4	4	10	4	0	3	4	6
6	4	4	4	4	10	4	0	3	4	6
6	4	4	4	4	10	4	0	3	4	6
6	4	4	4	4	10	4	0	3	4	6
6	4	4	4	4	10	4	0	3	4	6
6	4	4	4	4	10	4	0	3	4	6
6	4	4	4	4	10	4	0	3	4	6
6	4	4	4	4	10	4	0	3	4	6
6	4	4	4	4	10	4	0	3	4	6
6	4	4	4	4	10	4	0	3	4	6
6	4	4	4	4	10	4	0	3	4	6
6	4	4	4	4	10	4	0	3	4	6
6	4	4	4	4	11	4	0	3	4	6
6	4	4	4	4	11	4	0	3	4	7
6	4	4	4	4	11	4	0	3	4	7
6	4	4	4	4	11	4	0	3	4	7
6	4	4	4	4	11	4	0	3	4	7
6	5	5	4	4	11	5	0	3	4	7
6	5	5	4	4	11	5	0	3	4	7
6	5	5	4	4	11	5	0	3	4	7
6	5	5	4	5	11	5	0	3	4	7
7	5	5	4	5	11	5	0	3	4	7
7	5	5	4	5	11	5	0	3	4	7
7	5	5	4	5	11	5	0	3	4	7
7	5	5	4	5	11	5	0	3	4	7
7	5	5	4	5	11	5	0	3	4	7
7	5	5	4	5	11	5	0	3	4	7
7	5	5	4	5	11	5	0	3	4	7
7	5	5	4	5	11	5	0	3	4	7
7	5	5	4	5	11	5	0	3	4	7
7	5	5	4	5	11	5	0	3	4	7
7	5	5	4	5	11	5	0	3	4	7
7	5	5	4	5	11	5	0	3	4	7
7	5	5	4	5	0	5	0	3	4	7
7	5	5	4	5	0	5	0	3	4	7
7	5	5	4	5	0	5	0	3	4	7
7	5	5	4	5	0	5	0	3	4	7
7	5	5	4	5	0	5	0	3	4	7
7	5	5	4	5	0	5	0	3	4	7
7	5	5	4	5	0	5	0	3	4	7
7	5	5	4	5	0	5	0	3	4	7
7	5	5	4	5	0	5	0	3	4	7
7	5	5	4	5	0	5	0	3	4	7
7	5	5	4	5	0	5	0	3	4	7
7	5	5	4	5	0	5	0	3	4	7
7	5	5	4	5	0	5	0	3	4	7
7	5	5	4	5	0	5	0	3	4	7
7	5	5	4	5	0	5	0	3	4	7
7	5	5	4	5	0	5	0	3	4	7
7	5	5	4	5	0	5	0	3	4	7
7	5	5	4	5	0	5	0	3	4	7
7	5	5	4	5	0	5	0	3	4	7
7	5	5	4	5	0	5	0	3	4	7
7	5	5	4	5	0	5	0	3	4	7
7	5	5	4	5	0	5	0	3	4	7
7	5	5	4	5	0	5	0	3	4	7
7	5	5	4	5	0	5	0	3	4	7
7	5	5	4	5	0	5	0	3	4	7
7	5	5	4	5	0	5	0	3	4	7
7	5	5	4	5	0	5	0	3	4	7
7	5	5	4	5	0	5	0	3	4	7
7	5	5	4	5	0	5	0	3	4	7
7	5	5	4	5	0	5	0	3	4	7
7	5	5	4	5	0	5	0	3	4	7
7	5	5	4	5	0	5	0	3	4	7
7	5	5	4	5	0	5	0	3	4	8
7	5	5	5	5	0	5	0	3	4	8
7	5	5	5	5	0	5	0	3	4	8
7	5	5	5	5	0	5	0	3	4	8
7	5	5	5	5	0	5	0	3	4	8
8	5	5	5	5	0	5	0	3	4	8
8	5	5	5	5	0	5	0	3	4	8
8	5	5	5	5	0	5	0	3	4	8
8	5	6	5	5	0	5	0	3	4	8
8	5	6	5	5	0	5	0	3	4	8
8	5	6	5	5	0	5	0	3	4	8
8	5	6	5	5	0	5	0	3	4	8
8	5	6	5	5	0	5	0	3	4	8
8	5	6	5	5	0	5	0	3	4	8
8	5	6	5	6	0	5	0	3	4	8
8	5	6	5	6	0	5	0	3	4	8
8	5	6	5	6	0	5	0	3	5	8
8	5	6	5	6	0	5	0	3	5	8
8	5	6	5	6	0	5	0	4	5	8
8	5	6	5	6	0	5	0	4	5	8
8	5	6	5	6	0	5	0	4	5	8
8	5	6	5	6	0	5	0	4	5	8
8	5	6	5	6	0	5	0	4	5	8
8	5	6	5	6	0	5	0	4	5	8
8	5	6	5	6	0	5	0	4	5	8
8	5	6	5	6	0	5	0	4	5	8
8	5	6	5	6	0	5	0	4	5	8
8	5	6	5	6	0	5	0	0	5	8
8	5	6	5	6	0	5	0	0	5	8
8	5	6	5	6	0	5	0	0	5	8
8	5	6	5	6	0	5	0	0	5	8
8	5	6	5	6	0	5	0	0	5	8
8	5	6	5	6	0	5	0	0	5	8
8	5	6	5	6	0	5	0	0	5	8
8	5	6	5	6	0	5	0	0	5	8
8	5	6	5	6	0	5	0	0	5	8
8	5	6	5	6	0	5	0	0	5	8
8	5	6	5	6	0	5	0	0	5	8
8	5	6	5	6	0	5	0	0	5	8
8	5	6	5	6	0	5	0	0	5	8
8	5	6	5	6	0	5	0	0	5	8
8	5	6	5	6	0	5	0	0	5	8
8	5	6	5	6	0	6	0	0	5	8
8	5	6	5	6	0	6	0	0	5	8
8	5	6	5	6	0	6	0	0	5	8
8	5	6	5	6	0	6	0	0	5	8
8	5	6	5	6	0	6	0	0	5	8
8	5	6	5	6	0	6	0	0	5	8
8	5	6	5	6	0	6	0	0	5	8
8	5	6	5	6	0	6	0	0	5	8
8	5	6	5	6	0	6	0	0	5	8
8	6	6	5	6	0	6	0	0	5	8
8	6	6	5	6	0	6	0	0	5	9
9	6	6	5	6	0	6	0	0	5	9
9	6	6	5	6	0	6	0	0	5	9
9	6	6	5	6	0	6	0	0	5	9
9	6	6	5	6	0	6	0	0	5	9
9	6	6	5	6	0	6	0	0	5	9
9	6	6	5	6	0	6	0	0	5	9
9	6	6	5	6	0	6	0	0	5	9
9	6	6	5	6	0	6	0	0	5	9
9	6	6	5	6	0	6	0	0	5	9
9	6	6	5	6	0	6	0	0	5	9
9	6	6	5	6	0	6	0	0	5	9
9	6	7	5	6	0	6	0	0	5	9
9	6	7	5	6	0	6	0	0	5	9
9	6	7	6	7	0	6	0	0	5	9
9	6	7	6	7	0	6	0	0	5	9
9	6	7	6	7	0	6	0	0	5	9
9	6	7	6	7	0	6	0	0	5	9
9	6	7	6	7	0	6	0	0	5	9
9	6	7	6	7	0	6	0	0	5	9
9	6	7	6	7	0	6	0	0	5	9
9	6	7	6	7	0	6	0	0	5	9
9	6	7	6	7	0	6	0	0	5	9
9	6	7	6	7	0	6	0	0	5	9
9	6	7	6	7	0	6	0	0	5	9
9	6	7	6	7	0	6	0	0	5	9
9	6	7	6	7	0	6	0	0	5	9
9	6	7	6	7	0	6	0	0	5	9
9	6	7	6	7	0	6	0	0	5	9
9	6	7	6	7	0	6	0	0	5	9
9	6	7	6	7	0	7	0	0	5	9
9	6	7	6	7	0	7	0	0	5	9
9	6	7	6	7	0	7	0	0	5	9
9	6	7	6	7	0	7	0	0	5	9
9	6	7	6	7	0	7	0	0	5	9
9	6	7	6	7	0	7	0	0	5	9
9	6	7	6	7	0	7	0	0	5	9
9	6	7	6	7	0	7	0	0	5	9
9	6	7	6	7	0	7	0	0	5	9
9	6	7	6	7	0	7	0	0	5	9
9	6	7	6	7	0	7	0	0	5	9
9	6	7	6	7	0	7	0	0	5	9
9	6	7	6	7	0	7	0	0	5	9
9	6	7	6	7	0	8	0	0	5	9
9	6	7	6	7	0	0	0	0	5	9
9	6	7	6	7	0	0	0	0	5	9
9	6	7	6	7	0	0	0	0	5	9
9	6	7	6	7	0	0	0	0	5	9
9	6	7	6	7	0	0	0	0	5	9
10	6	7	6	7	0	0	0	0	5	10
10	6	7	6	7	0	0	0	0	5	10
10	6	7	6	7	0	0	0	0	5	10
10	6	7	6	7	0	0	0	0	5	10
10	6	7	6	7	0	0	0	0	5	10
10	6	7	6	7	0	0	0	0	5	10
10	6	7	6	7	0	0	0	0	5	10
10	6	7	6	7	0	0	0	0	5	10
10	6	7	6	7	0	0	0	0	5	10
10	6	7	6	7	0	0	0	0	5	10
10	7	7	6	7	0	0	0	0	5	10
10	7	7	6	7	0	0	0	0	5	10
10	7	8	6	7	0	0	0	0	6	10
10	7	8	6	7	0	0	0	0	6	10
10	7	8	6	8	0	0	0	0	6	10
10	7	8	6	8	0	0	0	0	6	10
10	7	8	6	8	0	0	0	0	6	10
10	7	8	6	8	0	0	0	0	6	10
10	7	8	6	8	0	0	0	0	6	10
10	7	8	6	8	0	0	0	0	6	10
10	7	8	6	8	0	0	0	0	6	10
10	7	8	6	8	0	0	0	0	6	10
10	7	8	6	8	0	0	0	0	6	10
10	7	8	6	8	0	0	0	0	6	10
10	7	8	6	8	0	0	0	0	6	10
10	7	8	6	8	0	0	0	0	6	10
10	7	8	6	8	0	0	0	0	6	10
10	7	8	6	8	0	0	0	0	6	10
10	7	8	6	8	0	0	0	0	6	10
10	7	8	6	8	0	0	0	0	6	10
10	7	8	7	8	0	0	0	0	6	10
10	7	8	7	8	0	0	0	0	6	10
10	7	8	7	8	0	0	0	0	6	10
10	7	8	7	8	0	0	0	0	6	10
10	7	8	7	8	0	0	0	0	6	10
10	7	8	7	8	0	0	0	0	6	10
10	7	8	7	8	0	0	0	0	6	10
10	7	8	7	8	0	0	0	0	6	10
10	7	8	7	8	0	0	0	0	6	10
10	7	8	7	8	0	0	0	0	6	10
10	7	8	7	8	0	0	0	0	6	10
10	7	8	7	8	0	0	0	0	6	10
10	7	8	7	8	0	0	0	0	6	10
10	7	8	7	8	0	0	0	0	6	10
11	7	8	7	8	0	0	0	0	6	10
11	7	8	7	8	0	0	0	0	6	10
11	7	8	7	8	0	0	0	0	6	10
11	7	8	7	8	0	0	0	0	6	10
11	7	8	7	8	0	0	0	0	6	11
11	7	8	7	8	0	0	0	0	6	11
11	7	8	7	8	0	0	0	0	6	11
11	7	8	7	8	0	0	0	0	6	11
11	7	8	7	8	0	0	0	0	6	11
11	7	8	7	8	0	0	0	0	6	11
11	7	8	7	8	0	0	0	0	6	11
11	7	8	7	8	0	0	0	0	6	11
11	7	8	7	8	0	0	0	0	6	11
11	7	8	7	8	0	0	0	0	6	11
11	7	8	7	0	0	0	0	0	6	11
11	7	8	7	0	0	0	0	0	6	11
11	7	9	7	0	0	0	0	0	6	11
11	7	9	7	0	0	0	0	0	6	11
11	7	9	7	0	0	0	0	0	6	11
11	7	9	7	0	0	0	0	0	6	11
11	7	9	7	0	0	0	0	0	6	11
11	8	9	7	0	0	0	0	0	6	11
11	8	9	7	0	0	0	0	0	6	11
11	8	9	7	0	0	0	0	0	6	11
11	8	9	7	0	0	0	0	0	7	11
11	8	9	7	0	0	0	0	0	7	11
11	8	9	7	0	0	0	0	0	7	11
11	8	9	7	0	0	0	0	0	7	11
11	8	9	7	0	0	0	0	0	7	11
11	8	9	7	0	0	0	0	0	7	11
11	8	9	7	0	0	0	0	0	7	11
11	8	9	7	0	0	0	0	0	7	11
11	8	9	7	0	0	0	0	0	7	11
11	8	9	7	0	0	0	0	0	7	11
11	8	9	7	0	0	0	0	0	7	11
11	8	9	7	0	0	0	0	0	7	11
11	8	9	7	0	0	0	0	0	7	11
11	8	9	7	0	0	0	0	0	7	11
11	8	9	7	0	0	0	0	0	7	11
11	8	9	7	0	0	0	0	0	7	11
11	8	9	7	0	0	0	0	0	7	11
11	8	9	7	0	0	0	0	0	7	11
11	8	9	8	0	0	0	0	0	7	11
12	8	9	8	0	0	0	0	0	7	11
12	8	9	8	0	0	0	0	0	7	11
12	8	9	8	0	0	0	0	0	7	11
12	8	9	8	0	0	0	0	0	7	11
12	8	9	8	0	0	0	0	0	7	11
12	8	9	8	0	0	0	0	0	7	11
12	8	9	8	0	0	0	0	0	7	11
12	8	9	8	0	0	0	0	0	7	11
12	8	9	8	0	0	0	0	0	7	11
12	8	9	8	0	0	0	0	0	7	12
12	8	9	8	0	0	0	0	0	7	12
12	8	9	8	0	0	0	0	0	7	12
12	8	9	8	0	0	0	0	0	7	12
12	8	9	8	0	0	0	0	0	7	12
12	8	9	8	0	0	0	0	0	7	12
12	8	9	8	0	0	0	0	0	7	12
12	8	9	8	0	0	0	0	0	7	12
12	8	0	8	0	0	0	0	0	7	12
12	8	0	8	0	0	0	0	0	7	12
12	8	0	8	0	0	0	0	0	7	12
12	8	0	8	0	0	0	0	0	7	12
12	8	0	8	0	0	0	0	0	7	12
12	8	0	8	0	0	0	0	0	7	12
0	8	0	8	0	0	0	0	0	7	12
0	8	0	8	0	0	0	0	0	7	12
0	8	0	8	0	0	0	0	0	7	12
0	0	0	8	0	0	0	0	0	7	12
0	0	0	8	0	0	0	0	0	7	12
0	0	0	8	0	0	0	0	0	7	12
0	0	0	8	0	0	0	0	0	0	12
0	0	0	8	0	0	0	0	0	0	12
0	0	0	8	0	0	0	0	0	0	12
0	0	0	8	0	0	0	0	0	0	12
0	0	0	8	0	0	0	0	0	0	12
0	0	0	8	0	0	0	0	0	0	12
0	0	0	8	0	0	0	0	0	0	12
0	0	0	8	0	0	0	0	0	0	12
0	0	0	8	0	0	0	0	0	0	12
0	0	0	8	0	0	0	0	0	0	12
0	0	0	8	0	0	0	0	0	0	12
0	0	0	8	0	0	0	0	0	0	12
0	0	0	8	0	0	0	0	0	0	12
0	0	0	9	0	0	0	0	0	0	12
0	0	0	9	0	0	0	0	0	0	12
0	0	0	9	0	0	0	0	0	0	12
0	0	0	9	0	0	0	0	0	0	12
0	0	0	9	0	0	0	0	0	0	12
0	0	0	9	0	0	0	0	0	0	12
0	0	0	9	0	0	0	0	0	0	12
0	0	0	9	0	0	0	0	0	0	12
0	0	0	9	0	0	0	0	0	0	12
0	0	0	9	0	0	0	0	0	0	12
0	0	0	9	0	0	0	0	0	0	13
0	0	0	9	0	0	0	0	0	0	13
0	0	0	9	0	0	0	0	0	0	13
0	0	0	9	0	0	0	0	0	0	13
0	0	0	9	0	0	0	0	0	0	13
0	0	0	9	0	0	0	0	0	0	13
0	0	0	9	0	0	0	0	0	0	13
0	0	0	9	0	0	0	0	0	0	13
0	0	0	9	0	0	0	0	0	0	13
0	0	0	9	0	0	0	0	0	0	13
0	0	0	9	0	0	0	0	0	0	13
0	0	0	9	0	0	0	0	0	0	13
0	0	0	9	0	0	0	0	0	0	13
0	0	0	0	0	0	0	0	0	0	13
0	0	0	0	0	0	0	0	0	0	13
0	0	0	0	0	0	0	0	0	0	13
0	0	0	0	0	0	0	0	0	0	13
0	0	0	0	0	0	0	0	0	0	13
0	0	0	0	0	0	0	0	0	0	13
0	0	0	0	0	0	0	0	0	0	13
0	0	0	0	0	0	0	0	0	0	13
0	0	0	0	0	0	0	0	0	0	13
0	0	0	0	0	0	0	0	0	0	13
