# Supplementary material for: Flood algorithm: a novel metaheuristic algorithm for optimization problems
Source: PeerJ Comput Sci. 2024 Oct 2;10:e2278. doi: 10.7717/peerj-cs.2278 (PMC11623059; doi:10.7717/peerj-cs.2278)
Supplement: Supplemental Information 18 [file peerj-cs-10-2278-s018.xlsx]

## Sheet: FA-GA
Session	FA_ranksum	GA_ranksum	p-value	z-value	logical
1	3775	1275	5.8184e-18	-8.6361	1
2	3775	1275	6.1046e-18	-8.6306	1
3	3775	1275	5.6769e-18	-8.6389	1
4	3775	1275	5.8985e-18	-8.6345	1
5	3700	1350	4.9397e-16	-8.113	1
6	3775	1275	1.5656e-19	-9.0401	1
7	3775	1275	6.2562e-18	-8.6278	1
8	3746	1304	3.7495e-17	-8.4205	1
9	3775	1275	6.8308e-18	-8.6177	1
10	3775	1275	6.5154e-18	-8.6231	1
11	3775	1275	4.9493e-18	-8.6545	1

## Sheet: FA-PSO
Session	FA_ranksum	PSO_ranksum	p-value	z-value	logical
1	3775	1275	5.9335e-18	-8.6338	1
2	3775	1275	6.1366e-18	-8.63	1
3	3775	1275	5.7682e-18	-8.6371	1
4	3775	1275	5.9605e-18	-8.6333	1
5	3775	1275	6.3448e-18	-8.6262	1
6	3775	1275	1.6173e-19	-9.0365	1
7	3775	1275	6.2718e-18	-8.6275	1
8	3775	1275	6.6374e-18	-8.621	1
9	3775	1275	6.8447e-18	-8.6175	1
10	3775	1275	6.5287e-18	-8.6229	1
11	3775	1275	5.1427e-18	-8.6502	1

## Sheet: FA-SA
Session	FA_ranksum	SA_ranksum	p-value	z-value	logical
1	3171.5	1878.5	6.2884e-06	-4.5165	1
2	3309.5	1740.5	4.8255e-08	-5.4576	1
3	3481	1569	3.2665e-11	-6.634	1
4	3312.5	1737.5	4.2918e-08	-5.4784	1
5	3276	1774	1.9551e-07	-5.2036	1
6	2770	2280	0.0152	-2.4273	1
7	3265	1785	2.8583e-07	-5.1326	1
8	2480	2570	0.7582	0.3079	0
9	3301.5	1748.5	8.4335e-08	-5.3576	1
10	3147.5	1902.5	1.6492e-05	-4.3078	1
11	3170	1880	6.2229e-06	-4.5187	1

## Sheet: Sayfa1
Session	FA versus GA			FA versus PSO			FA versus SA
	R+	R-	p-value	R+	R-	p-value	R+	R-	p-value
1	3775	1275	5.8184e-18	3775	1275	5.9335e-18	3171.5	1878.5	6.2884e-06
2	3775	1275	6.1046e-18	3775	1275	6.1366e-18	3309.5	1740.5	4.8255e-08
3	3775	1275	5.6769e-18	3775	1275	5.7682e-18	3481	1569	3.2665e-11
4	3775	1275	5.8985e-18	3775	1275	5.9605e-18	3312.5	1737.5	4.2918e-08
5	3700	1350	4.9397e-16	3775	1275	6.3448e-18	3276	1774	1.9551e-07
6	3775	1275	1.5656e-19	3775	1275	1.6173e-19	2770	2280	0.0152
7	3775	1275	6.2562e-18	3775	1275	6.2718e-18	3265	1785	2.8583e-07
8	3746	1304	3.7495e-17	3775	1275	6.6374e-18	2480	2570	0.7582
9	3775	1275	6.8308e-18	3775	1275	6.8447e-18	3301.5	1748.5	8.4335e-08
10	3775	1275	6.5154e-18	3775	1275	6.5287e-18	3147.5	1902.5	1.6492e-05
11	3775	1275	4.9493e-18	3775	1275	5.1427e-18	3170	1880	6.2229e-06
